1 **Article title: Introgression of type-IV glandular trichomes from *Solanum***  
2 ***galapagense* to cultivated tomato reveals genetic complexity for the development**  
3 **of acylsugar-based insect resistance**

4 Eloisa Vendemiatti<sup>1</sup>, Rodrigo Therezan<sup>1</sup>, Mateus H. Vicente<sup>1</sup>, Máisa de Siqueira Pinto<sup>1</sup>,  
5 Nick Bergau<sup>2</sup>, Lina Yang<sup>3</sup>, Walter Fernando Bernardi<sup>1</sup>, Severino M. de Alencar<sup>4</sup>,  
6 Agustin Zsögön<sup>5</sup>, Alain Tissier<sup>2</sup>, Vagner A. Benedito<sup>3\*</sup>, Lázaro E. P. Peres<sup>1\*</sup>.

7  
8 <sup>1</sup>*Department of Biological Sciences, Escola Superior de Agricultura "Luiz de Queiroz",*  
9 *Universidade de São Paulo, 13418-900, Piracicaba, SP, Brazil*

10 <sup>2</sup>*Department of Cell and Metabolic Biology, Leibniz Institute of Plant Biochemistry,*  
11 *Weinberg 3, Halle (Saale) 06120, Germany*

12 <sup>3</sup>*Division of Plant & Soil Sciences, West Virginia University, Morgantown, WV 26506,*  
13 *USA*

14 <sup>4</sup>*Department of Agri-Food Industry, Food and Nutrition, Escola Superior de*  
15 *Agricultura "Luiz de Queiroz", Universidade de São Paulo, 13418-900, Piracicaba,*  
16 *SP, Brazil*

17 <sup>5</sup>*Department of Plant Biology, Universidade Federal de Viçosa, 36570-900 Viçosa,*  
18 *MG, Brazil.*

19

20 **\*Corresponding authors:**

21

22 Lázaro Eustáquio Pereira Peres  
23 lazaro.peres@usp.br  
24 Escola Superior de Agricultura "Luiz de Queiroz"  
25 University of São Paulo - USP  
26 Av. Pádua Dias, 11 CP. 09  
27 13418-900 Piracicaba - SP  
28 BRAZIL

29

30 Vagner A. Benedito  
31 Vagner.Benedito@mail.wvu.edu  
32 West Virginia University  
33 Division of Plant & Soil Sciences  
34 3425 Agricultural Sciences Building  
35 1194 Evansdale Dr  
36 Morgantown, WV 26506-6108  
37 USA

38

39 **Summary**

40 Glandular trichomes are involved in the production of food- and medicine-relevant  
41 chemicals in plants, besides being associated with pest resistance. In some wild  
42 *Solanum* species closely related to the cultivated tomato (*S. lycopersicum*), the presence  
43 of type-IV glandular trichomes leads to the production of high levels of insecticide

44 acylsugars (AS). Conversely, low AS production observed in the cultivated tomato is  
45 attributed to its incapacity to develop type-IV trichomes in adult organs. Therefore, we  
46 hypothesized that cultivated tomatoes engineered to harbor type-IV trichomes on the  
47 leaves of mature plants can be pest resistant. We introgressed into the tomato cultivar  
48 Micro-Tom (MT) the capability of *S. galapagense* to maintain the development of type-  
49 IV trichomes throughout all plant stages, thus creating a line named "*Galapagos*  
50 *enhanced trichomes*" (MT-*Get*). Mapping-by-sequencing of MT-*Get* revealed that five  
51 chromosomal regions of *S. galapagense* were present in MT-*Get*. Further mapping  
52 revealed that *S. galapagense* alleles on chromosomes 1, 2 and 3 are sufficient for the  
53 presence of type-IV trichomes, but in lower densities. GC-MS, LC-MS, and gene  
54 expression analyses demonstrated that the increased density of type-IV trichomes was  
55 not accompanied by high AS production and exudation in MT-*Get*. Moreover, MT-*Get*  
56 did not differ from MT in its susceptibility to whitefly (*Bemisia tabaci*). Our findings  
57 demonstrates that type-IV glandular trichome development along with AS production  
58 and exudation are partially uncoupled at the genetic level. The MT-*Get* genotype  
59 represents a valuable resource for further studies involving the biochemical  
60 manipulation of type-IV trichome content through either genetic introgression or  
61 transgenic approaches.

62

63 **Significance Statement:** This work identified loci in the tomato genome that control  
64 the heterochronic development of type-IV glandular trichomes and uncoupled the  
65 genetic control of this type of trichome ontogeny from acylsugar biosynthesis and  
66 accumulation, revealing a higher than anticipated genetic complexity of acylsugar-  
67 based insect resistance. The findings reported herein will contribute to further dissect  
68 the genetics of trichome development in tomato as well as to introgress broad and  
69 durable insect resistance in tomato and other Solanaceae.

70

#### 71 **Key words**

72 acylsugars, glandular trichome, herbivory, *Solanum galapagense*, *Solanum*  
73 *lycopersicum*.

74

#### 75 **INTRODUCTION**

76 Glandular trichomes have attracted considerable attention due to their economic  
77 potential as sources of a vast array of specialized metabolites (Schimiller *et al.*, 2008;

78 Tissier, 2012). Among such metabolites, many have industrial or medicinal value  
79 (Aharoni *et al.*, 2005; Maes *et al.*, 2011), whereas others are especially relevant in the  
80 protection against insect pests (Kang *et al.*, 2010; Glas *et al.*, 2012). The cultivated  
81 tomato and its wild relatives display great variation in trichome type, size, and number.  
82 Eight morphologically distinct types were defined for the *Lycopersicon* clade (the  
83 cultivated tomato and its 16 closest wild relatives), of which four are glandular: the  
84 types I, IV, VI, and VII (Luckwill, 1943; Glas *et al.*, 2012). Type-IV trichomes (and,  
85 to a lesser extent, type-I trichomes, which are rare on tomato leaves) are sources of  
86 specialized metabolites called acylsugars (AS) (Kim *et al.*, 2012; Ghosh *et al.*, 2014;  
87 Ning *et al.*, 2015; Schilmiller *et al.*, 2015; Fan *et al.*, 2016).

88 AS molecules consist of aliphatic acyl groups of variable chain lengths (C2 to  
89 C12) esterified to a glucose (G) or sucrose (S) moiety at four possible positions  
90 (Schilmiller *et al.*, 2012; Ning *et al.*, 2015; Fan *et al.*, 2019). For instance, the AS  
91 molecule called S4:23 (2,4,5,12) is a sucrose-based AS esterified with C2, C4, C5, and  
92 C12 acyl groups, whose sum of aliphatic carbon atoms is 23. In the genus *Solanum*, AS  
93 confer resistance to fungal pathogens (Luu *et al.*, 2017) and to multiple insect pests  
94 (Goffreda *et al.*, 1990; Hawthorne *et al.*, 1992; Liedl *et al.*, 1995), such as whiteflies  
95 (*Bemisia spp.*), which is a major tomato (*S. lycopersicum*) pest worldwide (Maluf *et al.*,  
96 2010). AS deter insect and other arthropod attacks via distinct mechanisms, such as  
97 poisoning, sticking, and even “tagging” insects to increase predator recognition  
98 (Weinhold & Baldwin, 2011). Recently, it was demonstrated the horizontal  
99 transference of plant genes to whiteflies, which can be hijacked to neutralize plant-  
100 derived toxins (Xia *et al.*, 2021). This kind of mechanism is unlike to evolve for AS  
101 detoxification, since these compounds act not only chemically but also mechanically to  
102 combat whiteflies. Therefore, AS comprise a robust and stable mechanism for whitefly  
103 resistance.

104 Type-IV trichomes have a single flat basal cell with a short two- or three-celled  
105 stalk (0.2-0.4 mm) and a round gland at the tip. They are particularly abundant in the  
106 wild species *S. galapagense*, *S. habrochaites*, and *S. pennellii* (Simmons & Gurr, 2005).  
107 These species produce much larger amounts of AS compared to the cultivated tomato  
108 (Fobes *et al.*, 1985; Schilmiller *et al.*, 2010). AS accumulation underlies the robust and  
109 multiple pest resistances of these wild tomato species (Mutschler *et al.*, 1996; Momotaz  
110 *et al.*, 2010; Rodriguez-Lopez *et al.*, 2011; Leckie *et al.*, 2012; Schilmiller *et al.*, 2012).  
111 It was established that the cultivated tomato did not develop type-IV trichomes

112 (Luckwill, 1943; Simmons & Gurr, 2005; McDowell *et al.*, 2011; Glas *et al.*, 2012).  
113 However, we have demonstrated that they do appear in the early stages of plant  
114 development (from the cotyledons to the 3<sup>rd</sup> – 6<sup>th</sup> leaf, depending on the cultivar), and  
115 that they can be used as markers of juvenility in tomato (Vendemiatti *et al.*, 2017).  
116 Therefore, the lack of type-IV trichomes in the adult phase of the cultivated tomato  
117 explains the low presence of AS and susceptibility to herbivores.

118 Interestingly, the structural genes coding for the enzymes of the AS  
119 biosynthesis pathway are present in *S. lycopersicum* (Schillmiller *et al.*, 2012;  
120 Schillmiller *et al.*, 2015; Fan *et al.*, 2016; Smeda *et al.*, 2018). Indeed, four acylsugar  
121 acyltransferases (*ASAT1–ASAT4*) belonging to the BAHD acyltransferase superfamily  
122 were identified in the genomes of the cultivated tomato as well as its wild relatives  
123 (Schillmiller *et al.*, 2012; Schillmiller *et al.*, 2015; Fan *et al.*, 2016; Fan *et al.*, 2019).  
124 Biochemical characterization studies revealed that these *ASATs* sequentially catalyze  
125 the esterification of acyl chains at different positions of a sucrose moiety to generate a  
126 tetra-acylsucrose. Therefore, the catalytic activities of *ASATs* with different substrates  
127 can explain the diverse structures of *Solanum* spp. AS (Ghosh *et al.*, 2014; Fan *et al.*,  
128 2016; Nadakuduti *et al.*, 2017). Altogether, these observations led to the hypothesis that  
129 a cultivated tomato line modified to harbor type-IV trichomes on its adult leaves would  
130 accumulate high AS levels and be naturally resistant to pests.

131 Here, we successfully introgressed the capability of producing type-IV  
132 trichomes on adult leaves from *S. galapagense* LA1401 into the tomato genetic model  
133 system, cv. Micro-Tom (MT) (Carvalho *et al.*, 2011). The introgressed MT line was  
134 named "*Galapagos enhanced trichomes*" (MT-*Get*) and showed a high density of type-  
135 IV trichomes on all leaves throughout plant development. The *S. galapagense*'s regions  
136 introgressed into MT-*Get* were determined by mapping-by-sequencing. This unique  
137 genetic material allowed us to determine the functionality of type-IV trichomes on  
138 cultivated tomato and its impact on insect resistance. For this end, we performed qRT-  
139 PCR analysis of *ASAT1–ASAT4* genes in leaves and the expression of *pSIAT2::GFP* in  
140 type-IV trichome glands. The AS profile of MT-*Get* was also determined by LC-MS  
141 and GC-MS. A preliminary assay of insect resistance was performed using *Bemisa* spp,  
142 one of the main insect pests of tomato and that is a target of AS. Our findings pave the  
143 way for molecular breeding of commercial varieties harboring a high density of type-  
144 IV trichomes and revealed the steps necessary to pursue insect resistance in the  
145 cultivated tomato.

146

## 147 RESULTS

### 148 1. Introgression of the capacity to develop type-IV trichomes on adult leaves from 149 *Solanum galapagense* LA1401 into tomato (*S. lycopersicum* cv. Micro-Tom).

150 *Solanum galapagense* LA1401 was chosen as a source of type-IV trichomes for  
151 genetic introgression. This accession is closely related to the cultivated tomato and we  
152 noticed that, unlike the cultivated tomato, it has a high density of type-IV trichomes on  
153 adult leaves, especially on the abaxial leaf surface (Figure 1a,b,d). We have previously  
154 shown that the cultivated tomato plant produces type-IV trichomes only on cotyledons  
155 and juvenile leaves but not on adult leaves (Vendemiatti *et al.*, 2017). We, therefore,  
156 set out to introduce the genetic determinants controlling the capacity to bear type-IV  
157 trichomes on adult leaves from *S. galapagense* into the cultivated tomato.

158 *Solanum lycopersicum* cv. Micro-Tom was fertilized with pollen from *S.*  
159 *galapagense*. After self-fertilization of F<sub>1</sub> plants, we selected F<sub>2</sub> plants with type-IV  
160 trichomes on leaves of developed plants. These plants were backcrossed (BC<sub>1</sub>) using  
161 MT as the recurrent parent. The process was repeated five more times until a stable  
162 BC<sub>6</sub>F<sub>n</sub> line that no longer segregated for the trait was obtained. The introgression  
163 scheme is shown in Figure 1c. This new line was called “Galapagos enhanced  
164 trichomes” (MT-Get).

165 During the trichome characterization of F<sub>1</sub> plants, we observed a lower density  
166 of type-IV trichomes on both leaf surfaces compared to the parental *S. galapagense*,  
167 (Figure 1d,e), suggesting that this trait is dominant or semi-dominant with quantitative  
168 components.

169 We confirmed the identity of type-IV trichomes on adult leaves of MT-Get  
170 using scanning electron microscopy (Figure 2). The type-IV trichome is a structure up  
171 to 0.4 mm tall with a glandular cell at the tip, and a unicellular and flat base (Luckwill,  
172 1943; Channarayappa *et al.*, 1992; Glas *et al.*, 2012). This description fits with the  
173 structures shown in Figure 2c. Thus, these results confirmed the presence of type-IV  
174 trichomes on adult leaves of MT-Get, which are similar in morphology and size to those  
175 present in *S. galapagense* (Figure 2d).

176 We next verified whether the type-IV trichomes present in MT-Get were  
177 capable of expressing the acylsugar biosynthesis pathway. Transgenic MT and MT-Get  
178 plants harboring the *GFP* gene under the control of type-IV/I-specific *SLAT2* promoter  
179 (Schillmiller *et al.*, 2012) were generated. Both MT and MT-Get cotyledons, as well as

180 MT-*Get* adult leaves, displayed type-IV trichomes expressing GFP (Figure 3).  
181 Accordingly, the absence of visible GFP signal on adult leaves correlated with the  
182 absence of type-IV trichomes (Figure 3f). No GFP signal was detected in non-  
183 transgenic type-IV trichomes on the leaves of the MT-*Get* control (Figure S2a,b).

184

## 185 **2. Phenotypic characterization and genetic mapping of the “Galapagos enhanced** 186 ***trichomes*” (*Get*) introgression line**

187 The leaf developmental sequence of MT tomato from bottom to the top consists  
188 of a pair of embryonic leaves (cotyledons), a pair of juvenile leaves (1<sup>st</sup> and 2<sup>nd</sup> true  
189 leaves) and adult leaves (3<sup>rd</sup> to 6<sup>th</sup> upward) (Vendemiatti *et al.*, 2017). To further  
190 characterize MT-*Get* plants, we first determined trichome classes and their respective  
191 densities on adult (5<sup>th</sup>) leaves. When comparing MT-*Get* and the control MT, an inverse  
192 relationship between type-IV and -V trichomes on both leaf surfaces was observed  
193 (Figure 4). This pattern of type-IV predominance in MT-*Get* as opposed to type-V  
194 density in MT, was found in both juvenile as well as adult leaves (Figure S3). A lack  
195 of type-IV trichomes on MT adult leaves was observed (Figure S3a,b) and, on the other  
196 hand, MT-*Get* tended to lack type-V trichomes on juvenile leaves (Figure S3c,d). This  
197 inverse relationship between trichomes types IV and V had already been observed for  
198 several tomato cultivars in our previous report (Vendemiatti *et al.*, 2017).

199 When compared to *S. galapagense*, MT-*Get* displayed around 3.5-fold (abaxial)  
200 and 6.7-fold (adaxial) less type-IV trichomes (Figure 1d; Figure 4). *S. galapagense*,  
201 with only trichomes types I, IV and VI (Figure 1d; S4a), showed less trichome diversity  
202 than MT-*Get*. Conversely, MT-*Get* bore trichomes types I, III, VI and VII (Figure S4b,  
203 c) in addition to the types IV and V (Figure 4).

204 To determine the genetic configuration of MT-*Get*, *i.e.* the *S. galapagense*  
205 genome regions and alleles that were introgressed, we resorted to mapping-by-  
206 sequencing (Garcia *et al.*, 2016). This approach allows to bulk-sequence the genomes  
207 of phenotypical categories of a segregating population to identify common loci  
208 responsible for a trait through the identification of distinct allelic frequencies between  
209 groups. MT-*Get* has a complex genetic composition: discrete *S. galapagense* genome  
210 segments were found on the long arms of MT chromosomes 1, 2 and 3, the short arm  
211 of chromosome 5, and a large pericentromeric region of chromosome 6 (Figure 5). The  
212 genomic coordinates of the genetic variation from *S. galapagense* present at high  
213 frequencies ( $\geq 0.8$ ) in the *Get*-like phenotypical group of the MT-*Get* segregating

214 population are provided in Supporting Information Table **S2**. All the regions present on  
215 chromosomes 1, 2, 3, 5, and 6, or smaller combinations thereof, may be involved in  
216 type-IV trichome formation. Next, we segregated each fragment in sub-linages of *Get*  
217 using CAPS markers (Supplemental Table **S1**) that cover the extension of the fragments  
218 from *S. galapagense* in population derived from the Mapping-by-Sequencing  
219 experiment. We identified three sub-lines of MT-*Get* for the chromosomes 1, 2 and 3.  
220 Preliminary results revealed that these fragments are indeed involved with the type-IV  
221 trichome developmental pathway (Figure **S5**). When these three genomic fragments are  
222 isolated (Figure **S5c-h**), the type-IV trichome density is lower than in MT-*Get*, which  
223 carries all fragments (Figure **S5a,b**). These sequencing results suggest that the *Get* trait  
224 has a polygenic basis, involving epistatic interactions among multiple genes located in  
225 several genomic segments derived from *S. galapagense*, which probably control both  
226 trichome presence and density.

227 We also verified whether the presence of known alleles from *S. galapagense* in  
228 the introgressed segments could contribute to additional, developmental differences  
229 independent of trichome traits by comparing the distinct genomic regions between MT-  
230 *Get* and MT. Notably, within the chromosome 3 segment, MT-*Get* harbors the *S.*  
231 *galapagense* alleles for the genes *EJ-2* (Soyk *et al.*, 2017a) and *FW3.2* (Chakrabarti *et*  
232 *al.*, 2013) (Figure **5b**). The pleiotropic effects of non-domesticated alleles of the *FW3.2*  
233 gene, which codes for a *P450 monooxygenase*, are known to lead to a reduction in fruit  
234 weight and increased shoot branching (Chakrabarti *et al.*, 2013). Both phenotypes are  
235 present in MT-*Get* (Figure **S6a-d**), which harbours the *S. galapagense fw3.2* allele.  
236 Another gene controlling fruit weight is *FW2.2* (Frary *et al.*, 2000), although it cannot  
237 be responsible for the smaller fruit of MT-*Get* compared to MT because both genotypes  
238 harbour the same MT allele (Figure **5b**). Despite the large chromosome 6 segment from  
239 *S. galapagense* introgressed into MT-*Get* (Figure **5b**), this line has the same red fruit  
240 characteristic of MT (Figure **S6e,f**). This is due to the absence of the *S. galapagense B*  
241 allele, which is responsible for orange fruits (Figure **S6g**) and also maps on the long  
242 arm of chromosome 6 (Ronen *et al.*, 2000) but, accordingly, outside the introgressed  
243 region. Lastly, the reduced size of MT-*Get* sepal (Figure **S6e,f**) is probably an effect of  
244 the *EJ-2* allele from *S. galapagense* (Figure **S6h**), since this *MADS-box* gene controls  
245 the size of organ in this floral whorl (Soyk *et al.*, 2017a).

246

#### 247 **4. Whitefly resistance test and trichome exudation in MT-*Get* plants**

248           Based on the fact that type-IV trichomes drive whitefly (*Bemisia tabaci*)  
249 resistance in the same accession of *S. galapagense* used here (Firdaus *et al.*, 2012;  
250 Firdaus *et al.*, 2013; Vosman *et al.*, 2019), we verified whether MT-*Get* displayed an  
251 increased resistance to this insect. However, MT-*Get* did not differ from MT (Figure  
252 **S7a-c**) in a preliminary assay based on the number of whitefly nymphs on leaves after  
253 exposure to a controlled greenhouse infested with whiteflies. We also observed that  
254 MT-*Get* did not display exudates at the tip of the type-IV trichome gland. The  
255 production of such exudates which is a feature typical of *S. galapagense* (Figure **S7d,e**)  
256 that accounts for its sticky leaves and is regarded to be the effect of AS accumulation  
257 (Schilmiller *et al.*, 2008). We also observed that, differently from *S. galapagense*, MT-  
258 *Get* leaves were not sticky to the touch. *S. galapagense* exudates can be stained with  
259 Rhodamine-B, which is a dye for AS. In MT-*Get*, Rhodamine-B staining was restricted  
260 to the area inside the gland (see inserts in Figure **S7d,e**). These results prompted us to  
261 profile the AS accumulated on leaves and the expression of type-IV trichome-specific  
262 AS biosynthesis genes (Schilmiller *et al.*, 2012; Fan *et al.*, 2015; Schilmiller *et al.*,  
263 2015) in MT-*Get*.

264

## 265 **5. Acylsugar accumulation and related gene expression in MT-*Get***

266           Since type-IV trichomes are the main sources of AS (Goffreda *et al.*, 1989;  
267 Liedl *et al.*, 1995; Maluf *et al.*, 2010), we hypothesized that this insecticide would  
268 accumulate on adult leaves of the cultivated tomato upon the introduction of the  
269 capacity to maintain the development of type-IV trichomes. We, therefore, conducted  
270 a metabolic profile analysis using both liquid chromatography and mass spectrometry  
271 to assess AS accumulation on adult leaves of the MT-*Get*, compared to the parental *S.*  
272 *galapagense*.

273           *S. galapagense* showed peaks corresponding to a variety of sucrose (S)-based  
274 AS with different acyl moieties, ranging from 2 to 12 carbons (C2 to C12) (Figure **6**,  
275 Table **1**). Consistently, the AS peaks were very attenuated or absent in the cultivated  
276 tomato (MT), which is already known to accumulate very low amounts of AS (Figure  
277 **6**) (Blauth *et al.*, 1998). MT-*Get*, although accumulating more AS than MT, showed  
278 dramatic quantitative and qualitative differences when compared to *S. galapagense*.  
279 Notably, MT-*Get* showed reduced levels of AS harboring C10 and C12 moieties, such  
280 as S4:23 (2,4,5,12), S4:22 (2,5,5,10), and S4:24 (2,5,5,12) (Figure **6**, Table **1**). The  
281 amounts of S4:23, S4:22, and S4:24 were 120, 42, and 18-fold lower in MT-*Get* than



282 *S. galapagense*, respectively (Table 1). These differences are greater than those for  
283 type-IV trichome densities between *S. galapagense* and MT-*Get*, which were 3.5-fold  
284 (abaxial surface) and 6.7-fold (adaxial surface) (Figure 1, 4).

285 In the GC-MS analysis, detectable peaks of n-decanoate (C10) and n-  
286 dodecanoate (C12) were observed only for *S. galapagense* (Figure S8, Table S3). These  
287 carboxylates are derived from C10 and C12 harboring acylsugars, which agrees with  
288 the higher amounts of the acylsugars S4:23 (2,4,5,12), S4:22 (2,5,5,10) and S4:24  
289 (2,5,5,12) found in the LC-MS analysis in *S. galapagense* (Figure 6). Only small  
290 quantities of methyl dodecanoate were detected in MT-*Get* (Table 2), which correlates  
291 with the presence of S3:22 (5,5,12) and S4:24 (2,5,5,12) in this genotype (Figure 6).

292 We next evaluated the relative expression of the known genes involved in AS  
293 biosynthesis. There are four acyltransferases (ASAT) that act sequentially to esterify  
294 acyl chains in specific positions of the sugar moiety (Schillmiller *et al.*, 2012; Fan *et al.*,  
295 2016). The expression levels of the four *ASAT* genes were higher in *S. galapagense*  
296 leaves compared to MT-*Get* (Figure 7), which correlates with the differences in AS  
297 content determined (Figure 6, Table 1).

298 The relative expression of the genes coding for acylhydrolase (ASH) enzymes  
299 was also quantified (Figure S9a-c). They are responsible for the removal of acyl chains  
300 from specific AS positions, thus creating the substrate for the action of ASAT  
301 (Schillmiller *et al.*, 2016; Fan *et al.*, 2019). The relative expression of *ASH1* in MT-*Get*  
302 was significantly higher compared to *S. galapagense* (Figure S9a), which might also  
303 reflect the differences in AS content observed between these two genotypes.

304 Since MT-*Get* and *S. galapagense* seem to differ in the capacity to exudate AS  
305 (Figure S7), we assessed the gene expression of a putative efflux transporter, which  
306 may be responsible for AS exudation in type-IV trichome tips. Notably, the ABC  
307 transporter (Solyc03g005860) previously associated with AS exudation (Mandal *et al.*,  
308 2019) presented a higher expression level in *S. galapagense* compared to MT-*Get*  
309 (Figure S9d).

310

## 311 DISCUSSION

312 Type-IV trichomes are involved in important mechanisms for herbivore  
313 resistance in the *Solanum* genus and beyond. In the wild species *S. pennellii*, *S.*  
314 *galapagense*, and *S. habrochaites*, these structures are found at high densities, making  
315 them AS accumulators (Simmons & Gurr, 2005; Mutschler *et al.*, 1996; Momotaz *et*

316 *al.*, 2010; Leckie *et al.*, 2012; Schilmiller *et al.*, 2012). These specialized metabolites  
317 protect plants via both their toxicity and their stickiness, thereby trapping and  
318 immobilizing the insects, or labeling them for predator recognition (Mirnezhad *et al.*,  
319 2010; Weinhold & Baldwin, 2011; Vosman *et al.*, 2019; Schuurink & Tissier, 2019).  
320 Since type-IV trichomes are not found on the adult structures of the cultivated tomato  
321 (*S. lycopersicum*) (Vendemiatti *et al.*, 2017), obtaining and studying a line with this  
322 phenotype is a critical step towards a better understanding of broad insect resistance  
323 based on acylsugars as well as elucidating the molecular mechanisms of glandular  
324 trichome development. We created this line by introgressing into *S. lycopersicum* cv.  
325 Micro-Tom the trait from *S. galapagense* LA1401, which is a wild species related to  
326 the cultivated tomato and highly resistant to whiteflies (Firdaus *et al.*, 2013). We named  
327 the introgression line “*Galapagos enhanced trichomes*” (MT-*Get*).

328 MT-*Get* displays several traits that overall look intermediate between both  
329 parents: it has less glandular trichomes than *S. galapagense*, but a higher diversity of  
330 trichome types, whereas the comparison with MT has the opposite trend: MT-*Get* has  
331 more glandular trichomes and less diversity (Figure 8a). The reduction of the trichome  
332 diversity in *S. galapagense* and MT-*Get* is mainly represented by the reduced densities  
333 (or absence) of trichomes types III, V, and VI. In the case of type-V trichomes, its  
334 inverse correlation with type-IV structures had already been pointed out in a previous  
335 study comparing juvenile and adult leaves of cultivated tomato cultivars (Vendemiatti  
336 *et al.*, 2017). This result suggests that both trichome types may have an overlapping  
337 ontogeny since they only differ anatomically by the presence/absence of a terminal  
338 gland (Luckwill, 1943; Glas *et al.*, 2012). The density reduction of trichomes types III  
339 and VI might be also a consequence of the increased number of type-IV trichomes via  
340 a general mechanism of trichome initiation and differentiation that controls the identity  
341 of neighboring epidermal cells. The mechanism that prevents trichome formation in  
342 clusters is well known in *Arabidopsis* (Pesch & Hülskamp, 2011) and was recently also  
343 suggested for tomato (Schuurink & Tissier, 2019). Our findings reveal the complexity  
344 of studying trichome distribution as a trait in tomato since perturbations in one trichome  
345 type are likely to produce a pleiotropic effect in the abundance of other types.

346 Genetically, our analysis revealed that the development of type-IV trichomes is  
347 associated with multiple genes dispersed over several chromosomes. It is not clear yet  
348 whether all genomic fragments (loci) identified in this study are essential for type-IV  
349 trichome development. However, this result led us to hypothesize that the trait has a

350 polygenic inheritance and that some of the genes within these regions can explain the  
351 additional traits present in the introgressed lineage. One region found on chromosome  
352 2 coincides with a previous QTL associating adult whitefly survival and the presence  
353 of type-IV trichomes in segregating populations ( $F_2$  and  $F_3$ ) from a cross between the  
354 cultivated tomato and *S. galapagense* (Firdaus *et al.*, 2013; Vosman *et al.*, 2019). This  
355 is strong evidence that at least one gene that is necessary for type-IV trichome formation  
356 is located in this region of the genome. However, the preliminary analysis of sublines  
357 derived from MT-*Get* harboring *S. galapagense* alleles only in this region suggests that  
358 it is not sufficient for high type-IV densities. This same conclusion can be made for the  
359 *S. galapagense* alleles present on chromosome 1 and 3, whose corresponding sublines  
360 presented type-IV trichomes, but in lower densities. Therefore, it is likely that the high  
361 density of type-IV trichomes in MT-*Get* could be the result of epistatic interactions of  
362 different *S. galapagense* alleles. On chromosome 3, MT-*Get* also harbors *S.*  
363 *galapagense* alleles for two known developmental genes: *EJ-2* and *FW3-2*. However,  
364 it is unlikely that they can be directly associated with type-IV trichome development  
365 since these structures are absent in adult leaves of other species in the tomato clade  
366 carrying wild alleles of *EJ-2* and *FW3-2*. This is the case of the *S. cheesmaniae*  
367 accessions LA0521 and LA1139, and *S. pimpinellifolium* LA4645 (Simmons & Gurr,  
368 2005; Bitew, 2018).

369 The initial hypothesis that the presence of type-IV trichome was sufficient for  
370 high AS production and herbivore resistance was not borne out by our data. Our results  
371 show that MT-*Get* plants, although having a reasonable density of type-IV trichomes,  
372 do not produce AS on the same scale as *S. galapagense* (Figure 8b). In agreement with  
373 this, the MT-*Get* line did not show improved resistance to *Bemisia tabaci*, the main  
374 insect controlled by the presence of type-IV trichomes in the wild species (Maluf *et al.*,  
375 2010). One interesting feature observed here was the differences between MT-*Get* and  
376 *S. galapagense* in the accumulation of AS with medium-chain carbon groups (10 and  
377 12 carbons). These results suggest that among the genes controlling the AS metabolic  
378 pathway in *S. galapagense*, some could be related to the esterification of C10 and C12  
379 acyl groups, which may have repercussions for the level of insect resistance.

380 In our evaluation of the known structural genes of the AS pathway, we noticed  
381 that *ASAT1* (Solyc12g006330), *ASAT2* (Solyc04g012020), *ASAT3* (Solyc11g067270),  
382 and *ASAT4* (Solyc01g105580) are not located within any of the introgressed regions  
383 (See Figure 5). This means that *S. galapagense* and MT-*Get* have distinct alleles for

384 these genes, including potentially *cis*-regulatory elements. Therefore, the effect of both  
385 *cis* and *trans* elements on regulating the expression of *ASAT* genes may explain the  
386 higher expression of *S. galapagense* compared to MT-*Get*. However, we cannot  
387 exclude that the differences in transcript accumulation may also reflect in part the  
388 enriched content of type-IV trichome-derived RNAs in *S. galapagense* due to their  
389 higher density compared to that of MT-*Get* (Figure 1d, 4). On the other hand, the  
390 difference in *ASAT4* expression between MT-*Get* and *S. galapagense* is far beyond the  
391 magnitude of the trichome density difference between these genotypes. It is interesting  
392 to note that the higher expression of *ASAT2* in *S. galapagense* is consistent with the  
393 observation of increased levels of C10-12 acyl groups in the wild parental genotype  
394 (Figure 6). We propose that the enzyme encoded by *ASAT2* from *S. galapagense* may  
395 be able to esterify more efficiently medium-acyl chains (up to 12 carbons) in the R3  
396 position of the sucrose backbone than the MT allele (Fan *et al.*, 2016; Figure 7).

397 Since AS are non-volatile compounds, they are produced in the glands and by a  
398 mechanism that is not yet clear, drip out of the gland (Schuurink & Tissier, 2019). This  
399 phenomenon was observed for *S. galapagense* (Figure S7d) and may sustain the  
400 positive feedback responsible for AS production. A comparative transcriptomic  
401 analysis of *Solanum pennellii* accessions with distinct AS contents found that the  
402 expression levels of most AS metabolic genes were positively correlated with AS  
403 accumulation (Mandal *et al.*, 2019). Among the differentially expressed genes (DEGs),  
404 three genes putatively encoding ATP-binding cassette (ABC) transporters were  
405 upregulated in the accessions with high AS content. Furthermore, Dimissie *et al.* (2019)  
406 described an ABC transporter strongly expressed in the glandular trichomes of  
407 *Lavandula angustifolia* (Lamiaceae). Based on this information, we verified the relative  
408 expression of an ABC transporter (Solyc03g005860) in our material and found the same  
409 pattern of *ASAT* expression, i.e., its gene expression was closely related to the type-IV  
410 trichome density on the leaves (Figure S9d). While this result suggests that this ABC  
411 transporter may be involved in AS exudation, the actual factors accounting for the  
412 differences in AS exudation capacity between *S. galapagense* and MT-*Get* remains to  
413 be discovered. It is worth noting that AS transport could be critical in determining how  
414 much AS is produced and secreted. One possibility is that AS would remain inside the  
415 trichome head in the absence of efficient transport, leading to feedback inhibition. On  
416 the other hand, efficient transport might drive biosynthesis by creating a metabolic flux,

417 thereby potentially preventing feedback inhibition, and ultimately leading to high AS  
418 accumulation.

419 **We** initially expected that type-IV trichomes of *S. galapagense* would have the  
420 capacity to accumulate the amounts of sugar moieties necessary to be acylated in the  
421 gland tip. Studies using radiolabeled carbon in tobacco showed that isolated trichome  
422 glands might be metabolically independent to produce the main exudates, but only  
423 when adequately supplied with carbon sources (Kandra & Wagner, 1988). Earlier  
424 transcription analyses performed with expressed sequence tags (EST) indicated that  
425 trichomes could work with simple biochemical input while having few highly active  
426 biochemical pathways of the primary and specialized metabolisms locally and highly  
427 active (Schillmiller *et al.*, 2008). Although type-IV trichomes contain chloroplasts  
428 (Figure S2c), these probably are not in sufficient number to sustain the primary as well  
429 as the specialized metabolisms occurring in the cells of this structure (Schillmiller *et al.*,  
430 2008; Balcke *et al.*, 2017). Therefore, the differences in AS accumulation are unlikely  
431 to be fully explained by genes related to modifications of the acyl moiety, such as  
432 *ASATs* and *ASHs*. Still, instead, there could be additional unknown genes involved in  
433 sugar metabolism or transport that can enable the trichome gland to become a stronger  
434 sink.

435

### 436 **Concluding remarks**

437 The results presented here and their implications can be summarized in a model  
438 in which the transfer of insect resistance from a wild species into the cultivated tomato  
439 requires the stacking of three types of genetic determinants: i) Favourable alleles  
440 necessary to build the specific glandular trichomes at a correct developmental stage,  
441 such as in *MT-Get*; ii) Favourable alleles necessary for specific metabolic pathways  
442 (*e.g.* different compositions of acyl groups and capacity to accumulate the sugar  
443 moiety), and iii) Favourable alleles necessary to transform glandular trichomes into  
444 exudation structures, such as transmembrane transporters (Figure 8c). The *MT-Get*  
445 introgression line presented here is the starting point of a challenging, long-sought  
446 breeding goal – the introduction of a trait in tomato for effective, broad, long-lasting  
447 insect resistance, and decrease the pesticide use. Altogether, this study demonstrates  
448 that glandular trichome development along with the metabolite production pathway and  
449 exudation are partially uncoupled at the genetic level. The *MT-Get* genotype represents  
450 a valuable resource for further studies involving the biochemical manipulation of type-

451 IV trichome content through either genetic introgression or transgenic approaches. *In*  
452 *toto*, MT-*Get* is the first step to creating a tomato plant that naturally produces a  
453 substance that actively kills pests. In other words, we have created plants that carry the  
454 weapon, but we require a deeper understanding of genetics to load it with the  
455 appropriate metabolic ammunition.

456

## 457 **EXPERIMENTAL PROCEDURES**

### 458 *Plant material, growth conditions and breeding scheme*

459 Seeds of *Solanum galapagense* LA1401 were obtained by the Tomato Genetics  
460 Resource Center (TGRC - University of California). Micro-Tom (MT) seeds were  
461 donated by Dr. Avram Levy (Weizmann Institute of Science, Israel) and maintained  
462 through self-pollination as a true-to-type cultivar since 1998. The “*Galapagos*  
463 *enhanced trichome*” (MT-*Get*) line was generated by the cross MT x *S. galapagense*  
464 LA1401 using MT as the female donor and as the recurrent parent in the further  
465 backcrosses necessary for introgression (Figure 1). The process of introgression was  
466 based on visual screening on stereoscope for the presence of a high density of type-IV  
467 trichomes on adult leaves (5<sup>th</sup> leaf in the MT background; Vendemiatti *et al.*, 2017) and  
468 followed the procedure previously described by Pino *et al.* (2010). Plants were grown  
469 in a greenhouse under natural day-length conditions (Lombardi-Crestana *et al.*, 2012).

470

### 471 *Plant genetic transformation*

472 Constructs containing the green fluorescent protein (GFP) reporter driven by  
473 *pSLAT2*, which directed the expression of GFP to the tip of trichomes types I and IV  
474 (Schillmiller *et al.*, 2012), were kindly provided by Dr. Robert Last (Michigan State  
475 University, USA). The constructs were introduced into *Agrobacterium tumefaciens*  
476 LBA4404 and used to transform MT and MT-*Get* as described by Pino *et al.* (2010).  
477 Plants regenerated under kanamycin selection, were acclimated in a greenhouse, and  
478 cultivated as described above.

479

### 480 *Trichome counting and phenotyping*

481 Identification and counting of trichomes were carried out as described by  
482 Vendemiatti *et al.* (2017). At least 8 individuals per genotype were sampled, and four  
483 different samples were analyzed per plant on each leaf surface. Photographs were taken  
484 using a Leica S8AP0 (Wetzlar, Germany) at 50x magnification, coupled to a Leica

485 DFC295 camera (Wetzlar, Germany). Counting and length measurements of trichomes  
486 were performed on the images using the manufacturer's analytical program (Leica  
487 Application Suite 4.0).

488

#### 489 *Scanning electron microscopy*

490 Leaf samples were fixed in Karnovsky solution for 24 hours at 4°C. The  
491 material was then washed twice with 0.05 M cacodylate solution for 10 minutes and  
492 fixed again in osmium tetroxide for 1 hour. Subsequently, the samples were washed  
493 with distilled water and dehydrated in a series of acetone baths. The dehydrated samples  
494 were submitted to drying to the critical point, and subsequently gold plated. The  
495 observations were performed on a LEO 435 VP scanning electron microscope  
496 (SEMTEch Solutions, Massachusetts).

497

#### 498 *Fluorescence microscopy*

499 For trichome-specific expression of GFP under the *SLAT2* promoter, analyses  
500 were carried out under a Nikon SMZ18 stereoscope attached to a Nikon DS-R11 digital  
501 camera. Excitation at 480 nm and a 505 nm emission filter detected fluorescence  
502 specifically from GFP. For chloroplast fluorescence detection, trichomes were  
503 observed under a Carl Zeiss Axioskop 2 microscope coupled to an AxioCam MRc Zeiss  
504 camera using 540/625 nm excitation/emission filter.

505

#### 506 *Mapping-by-Sequencing Analysis*

507 A segregating BC<sub>7</sub>F<sub>2</sub> population composed of 315 plants from the cross MT-  
508 *Get* (BC<sub>6</sub>F<sub>n</sub>) x MT was phenotyped for the presence of type-IV trichomes on adult (5<sup>th</sup>)  
509 leaves according to the methodology described above. Plants were classified into two  
510 populations: plants with leaves bearing type-IV trichomes (*Get*-like) and those with  
511 virtually no type-IV trichomes observed (MT-like). Five leaf discs (7-mm diameter)  
512 from each plant were collected and pooled into two populations according to phenotype  
513 before extraction of genomic DNA using the method described by Fulton *et al.* (1995).  
514 The genomic DNA was further purified with the MasterPure kit (Lucigen, MC85200)  
515 and submitted to sequencing on a HiSeq PE150bp (Illumina) at Novogene  
516 (<https://en.novogene.com>) with 30X depth. Fastq files for each population were  
517 concatenated and submitted to quality check by FastQC on the Galaxy platform  
518 (<https://usegalaxy.org>). Mapping of reads against the cv. Micro-Tom v.1 genome

519 reference sequence (Sol\_mic assembly: <http://gbf.toulouse.inra.fr/Genome>) was  
520 carried out with the “Map with BWA for Illumina” (v.1.2.3) software on Galaxy, using  
521 default parameters (Li & Durbin, 2009) to generate “.sam” files. The variant calling  
522 against the cv. Micro-Tom assembly was performed with Samtools Mpileup (v.1.8) (Li  
523 *et al.*, 2009) and BCFtools call (v.1.6) to generate VCF files. Further comparisons  
524 between *Get*-like variants (S1) against the MT-like population (S4) were performed  
525 with BCFtools isec (v.1.6) on the command line interface. The variant allelic  
526 frequencies were filtered per site relative to the MT genome sequence using the  
527 following parameters: i) total depth of reading ( $10 < DP < 100$ ); ii) allele frequency  
528 ( $AF \geq 0.8$ ), which is defined as the alternative depth of reading (AD) divided by the  
529 total depth of reading (DP); and iii) number of variants per 1 Mbp window  $\geq 30$   
530 (Mascher *et al.*, 2014; Garcia *et al.*, 2016). The analysis pipeline can be visualized in  
531 Supporting Information Figure S1.

532

### 533 *Micro-Tom and S. galapagense allele genotyping*

534 Genomic DNA was extracted using the protocol described by Fulton *et al.*  
535 (1995). The DNA quantity and quality were determined using agarose gel  
536 electrophoresis and NanoDrop One spectrophotometer (Thermo Fisher Scientific). The  
537 genotyping was performed using CAPS markers that discriminate *Solanum*  
538 *lycopersicum* cv. MT and *Solanum galapagense* alleles (Table S1). Each 12- $\mu$ L PCR  
539 reaction contained 1.0  $\mu$ L DNA, 1.2  $\mu$ L Taq buffer (10x), 1.5  $\mu$ L  $MgCl_2$  (25 nM), 0.2  
540  $\mu$ L dNTPs (10 mM), 0.4  $\mu$ L each primer (10 pM), 0.1  $\mu$ L Taq DNA polymerase (5U/ $\mu$ L  
541 - Thermo Fisher Scientific), and 7.2  $\mu$ L distilled water. The PCR programs were  
542 developed according to the optimum annealing temperatures and amplicon sizes of each  
543 primer set. The digestion reactions (10 $\mu$ L) contained 4.0  $\mu$ L PCR product, 1.0  $\mu$ L  
544 enzyme buffer (10x), 0.2  $\mu$ L restriction enzyme, and 4.8  $\mu$ L water. The products were  
545 analyzed on 1.5% (w/v) agarose gels, using SYBR<sup>®</sup> Gold Nucleic Acid Gel Stain  
546 (Invitrogen).

547

### 548 *Plant phenotyping*

549 Forty-eight-day old plants were used for measuring the length of the main stem  
550 and the length of the secondary branches of the plant, and the branching index was  
551 calculated according to Morris *et al.* (2001). For fruit weight measurements, MT and  
552 MT-*Get* plants growing in 250-mL pots were hand-pollinated with their own pollen.



553 Many ovaries were pollinated, but after fruit set confirmation (five days after  
554 pollination), we performed selective fruit thinning to allow only five fruits to develop  
555 and ripe on each plant.

556

#### 557 *Herbivory test with Bemisia tabaci*

558 Seeds were sown in plastic trays using coconut fiber substrate and remained in  
559 greenhouse conditions until the transplant. The seedlings were then transplanted into 8-  
560 liter pots with substrate. Each pot received 5 plants of the same genotype. The plants  
561 were kept in a greenhouse until 23 days after transplanting. During the interval between  
562 transplanting and the beginning of inoculation, the plants received the appropriate  
563 cultural treatments and fertilization. After 23 days, the pots were randomly placed in a  
564 greenhouse chamber (7m x 15m) highly infested with a whitefly population (*Bemisia*  
565 *tabaci*), where the insects are bred and kept exclusively for tomato resistance tests. The  
566 pots remained there for 7 days to allow egg laying on the leaves of the plants. After the  
567 inoculation period, a vase of each genotype, each containing 5 plants, was randomly  
568 collected. From these plants, 30 leaflets were collected to perform the counting of  
569 hatched nymphs.

570

#### 571 *Rhodamine-B assay for acylsugar staining*

572 Leaflets of *S. galapagense* and MT-*Get* were submerged in a 0.1% aqueous  
573 solution of Rhodamine-B for one minute. Subsequently, the samples were gently  
574 immersed in distilled water four times (serially) to remove the excess dye. The images  
575 of stained trichomes were taken as described above.

576

#### 577 *LC-MS/MS analysis of surface extracts*

578 This experiment was carried out by the Glandular Trichomes and Isoprenoid  
579 Biosynthesis Research Group at the Leibniz Institute for Plant Biochemistry (Halle,  
580 Germany). Semipolar metabolites were extracted by placing two tomato leaflets (of the  
581 5<sup>th</sup> leaf) in a 2-mL reaction tube containing 1 mL of methanol. After vortexing, the  
582 samples for 1 min the supernatant was transferred to a new tube, centrifuged for 5 min  
583 at 18,000 g and filled in a glass vial. The analysis of the extracted metabolites was  
584 performed on a LC-MS/MS system composed of an Acquity UPLC (Waters GmbH,  
585 Eschborn, Germany) and a TripleTOF 5600 mass spectrometer (SCIEX, Toronto,  
586 Canada). For the separation of the analytes, 5  $\mu$ L of extracts were injected into a

587 Nucleoshell RP 18 column (2.7  $\mu\text{m}$  x 150 mm x 2 mm, Macherey-Nagel GmbH, Düren,  
588 Germany). A solvent system composed of A: 0.3 mM ammonium formate acidified  
589 with formic acid at pH 3, and B: acetonitrile, with the following gradient was used: 0-  
590 2 min: isocratic 95% A, 2-19 min: linear from 95% to 5% A, 19-22 min: isocratic 5%  
591 A, 22-22.01 min: linear from 5% A to 95% A, 22.01-24 min: isocratic 95% A. The flow  
592 rate was set to 400  $\mu\text{L}/\text{min}$  throughout and the column temperature was 40°C. Analyte  
593 ionization was performed by electrospray ionization in negative mode with the  
594 following parameters: gas 1 = 60 psi, gas 2 = 70 psi, curtain gas = 35 psi, temperature  
595 = 600°C and ion spray voltage floating = -4500 V. CID fragment spectra were generated  
596 in SWATH mode (Hopfgartner *et al.*, 2012) with mass windows of 33 Da and rolling  
597 collision energies from -10 to -80 V with a collision energy spread of 15 V. The  
598 integration of the peak areas was performed by Multiquant (Version 2.0.2; SCIEX,  
599 Toronto, Canada).

600

#### 601 *GC-MS Acyl sugar quantification*

602 This experiment was carried out at the Laboratory of Biochemistry and  
603 Instrumental Analysis of the Department of Agroindustry, Food, and Nutrition  
604 (ESALQ-USP). Leaves of the adult vegetative phase (5<sup>th</sup> leaf) were collected, and the  
605 extraction was conducted according to the methodology described by Leckie *et al.*  
606 (2013). The compounds were separated via GC-2010 gas chromatography (Shimadzu  
607 Corp., Kyoto, Japan) attached to a QP 2010 Plus mass spectrometer (Shimadzu Corp.,  
608 Kyoto, Japan), using Helium as the charging gas. For the separation of acyl groups from  
609 the acyl-sugar molecules, hexane was injected into a DB-WAX apolar column (0.25  
610 mm diameter, 30 m length, and 0.25  $\mu\text{m}$  film thickness). The data obtained were  
611 analyzed using the software Lab Solutions-GC/MS version 2.5 (Shimadzu Corp.,  
612 Kyoto, Japan). Compound identification was based on the retention time of  
613 chromatographic peaks and fragments of the mass spectrometer, which were compared  
614 to available standards and data libraries (Wiley® 8 and FFNSC 1.3). The identified  
615 compounds were quantified using a calibration curve derived from the peak areas of  
616 the standards.

617

#### 618 *Gene expression analyses*

619 The expression of key structural genes involved in the AS biosynthesis pathway  
620 was performed by real-time PCR in MT, MT-*Get*, and the wild species *S. galapagense*.

621 The comparison was performed only in genotypes harboring type-IV trichome in all  
622 leaves. Total RNA was isolated from leaf pools using the mirVana™ Isolation Kit  
623 (Ambion) according to the manufacturer's instructions. The RNA was quantified on a  
624 NanoDrop One UV-Vis Spectrophotometer (Thermo Scientific), and the RNA integrity  
625 was examined by gel electrophoresis. The total RNA was treated with TURBO DNA-  
626 free™ Kit (Invitrogen™) and subsequently used for cDNA synthesis using the  
627 SUPERScript™ IV 1<sup>st</sup> Strand Synthesis kit (Invitrogen) according to the  
628 manufacturer's instructions. Quantitative RT-PCR (qPCR) reactions were conducted in  
629 a 10-μL total volume using a 2× GoTaq® qPCR Master Mix (Promega) and run on an  
630 ABI 7500 qPCR thermocycler (Applied Biosystems). The constitutive housekeeping  
631 genes *ACTIN* (Solyc04g011500) and *ELONGATION FACTOR 1 ALPHA (EF-1α)*,  
632 *Solyc06g005060*) were used as internal controls. We used three biological repetitions,  
633 each composed of 5 leaves, and three technical repetitions. The threshold cycle ( $C_T$ )  
634 was determined automatically by the instrument, and fold changes for each gene of  
635 interest were calculated using the equation  $2^{-\Delta\Delta C_t}$  (Livak & Schmittgen, 2001). The  
636 qPCR primer sequences used are listed in Supporting Information Table S1.

637

### 638 *Statistical analyses*

639 The LC-MS data were converted to the Log10 function before analysis. The  
640 statistical comparisons with ANOVA and the Student's *t*-test were performed using the  
641 SAS software. The remaining results were compared statistically by the Student's *t*-test  
642 using GraphPad Prism version 7.00 for Mac (GraphPad Software, La Jolla California  
643 USA, [www.graphpad.com](http://www.graphpad.com)).

644

### 645 **ACCESSION NUMBERS**

646 DNA-Seq raw dataset used for mapping-by-sequencing was submitted to the NCBI  
647 Sequence Read Archive (BioProject # XXXX - *data currently under submission*).

648

### 649 **ACKNOWLEDGEMENTS**

650 This work was supported by funding from the Agency for the Support and Evaluation  
651 of Graduate Education (CAPES, Brazil), the National Council for Scientific and  
652 Technological Development (CNPq, Brazil), and the São Paulo Research Foundation  
653 (FAPESP, Brazil). This work was partially supported by FAPESP grants 2015/50220-

654 2 and 2018/05003-1. CAPES is thanked for scholarships granted to RT and EV. EV,  
655 MSP and MHV received scholarships from FAPESP (grants #2016/22323-4,  
656 2016/17092-3, and 2016/05566-0, respectively). SMA and LEPP received fellowships  
657 from CNPq (grants # 307893/2016-2 and 306518/2018-0, respectively). We also thank  
658 Dr. Mohamed Zouine (INP-Toulouse, France) for making the cv. Micro-Tom genome  
659 sequence available, and Dr. Robert Last (Michigan State University, USA) for the  
660 *pSLAT2::GFP* construct. We also thank our technician, Cassia R. F. Figueiredo,  
661 NAP/MEPA (ESALQ/USP) for assistance with electronic microscopy, Francisco Vitti  
662 for greenhouse assistance, and the former students Ariadne F. L. de Sá and Frederico  
663 A. de Jesus for PCR primer design.

664

## 665 **SHORT LEGENDS FOR SUPPORTING INFORMATION**

666 **Figure S1** Mapping-by-sequencing bioinformatic analysis pipeline

667 **Figure S2** Absence of green fluorescence in non-transgenic MT-*Get* type-IV  
668 trichomes, and fluorescence of type-IV trichomes in *S. galapagense* showing the  
669 presence of chloroplasts.

670 **Figure S3** Ontogenetic sequence of type-IV and -V trichomes on both leaf surfaces  
671 of Micro-Tom (MT) and MT-*Get*.

672 **Figure S4** Counting of others trichomes types in *Solanum galapagense*, and density  
673 ( $\text{mm}^{-2}$ ) of additional trichome types on both leaf surfaces of Micro-Tom (MT) and  
674 MT-*Get*.

675 **Figure S5** Density ( $\text{mm}^{-2}$ ) of types-IV and -V trichomes on abaxial surfaces of leaves  
676 from MT-*Get*, and sublines MT-*Get*01, MT-*Get*02 and MT-*Get*03.

677 **Figure S6** Comparative scheme of some phenotypical and genetic traits from Micro-  
678 Tom (MT), MT-*Get* and *Solanum galapagense*.

679 **Figure S7** Representative pictures and quantification of whitefly (*Bemisia tabaci*)  
680 nymph infestation on Micro-Tom and MT-*Get* leaves. Representative micrographs of  
681 *Solanum galapagense* droplets on type-IV trichomes and their absence in MT-*Get*. In  
682 the inserts, trichomes were dyed with Rhodamine-B, revealing AS exudation in *S.*  
683 *galapagense*'s type-IV trichomes.

684 **Figure S8** GC-MS profile comparison between *Solanum galapagense* LA1401, Micro-  
685 Tom (MT) and MT-*Get* regarding acyl groups content. Full mass spectrum scan  
686 showing the relative abundance of ions for acyl group peaks found on extracts analyzed  
687 by GC-MS.

688 **Figure S9** Relative transcript accumulation of genes coding for *ASH* enzymes, and  
689 ABC transporter on leaf tissues of MT-*Get* and *S. galapagense*.

690 **Table S1** Oligonucleotide sequences used for molecular characterization.

691 **Table S2** Genomic coordinates of the genetic variation from *S. galapagense* present at  
692 high frequencies ( $\geq 0.8$ ) in the *Get*-like phenotypical group of the MT-*Get* segregating  
693 population.

694 **Table S3** GC-MS profiles of acyl groups in *S. galapagense*, MT-*Get* and Micro-Tom  
695 (MT).

696 **Data S1** Genetic polymorphism found in *Get*-introgressed populations through DNA-  
697 sequencing analysis.

698

## 699 REFERENCES

700

701 **Aharoni A, Jongsma MA, Bouwmeester HJ. 2005.** Volatile science? Metabolic  
702 engineering of terpenoids in plants. *Trends in Plant Science* **10**: 594-603.  
703 <https://doi.org/10.1016/j.tplants.2005.10.005>

704

705 **Balcke GU, Bennewitz S, Bergau N, Athmer B, Henning A, Majovsky P, Jimenez-  
706 Gomez JM, Hoehenwarter W, Tissier A. 2017.** Multi-omics of tomato glandular  
707 trichomes reveals distinct features of central carbon metabolism supporting high  
708 productivity of specialized metabolites. *Plant Cell* **29**: 960-983.  
709 <https://doi.org/10.1105/tpc.17.00060>

710

711 **Bishop GJ, Harrison K, Jones JDG. 1996.** The tomato *DWARF* gene isolated by  
712 heterologous transposon tagging encodes the first member of a new cytochrome P450  
713 family. *Plant Cell* **8**: 959-969. <https://doi.org/10.1105/tpc.8.6.959>

714

715 **Bitew MK. 2018.** Significant role of wild genotypes of tomato trichomes for *Tuta*  
716 *absoluta* resistance. *Journal of Plant Genetics and Breeding* **2**: 104.

717

718 **Blauth SL, Churchill GA, Mutschler MA. 1998.** Identification of quantitative trait  
719 loci associated with acylsugar accumulation using intraspecific populations of the wild  
720 tomato, *Lycopersicon pennellii*. *Theoretical and Applied Genetics* **96**: 458 - 467.  
721 <https://doi.org/10.1007/s001220050762>

722

723 **Carvalho RF, Campos ML, Pino LE, Crestana SL, Zsögön A, Lima JE, Benedito  
724 VA, Peres LE. 2011.** Convergence of developmental mutants into a single tomato  
725 model system: “Micro-Tom” as an effective toolkit for plant development research.  
726 *Plant Methods* **7**: 18. <https://doi.org/10.1186/1746-4811-7-18>

727

728 **Chakrabarti M, Zhang N, Sauvage C, Munos S, Blanca J, Canizares J, Diez MJ,  
729 Schneider R, Mazourek M, McClead J et al. 2013.** A cytochrome P450 regulates a  
730 domestication trait in cultivated tomato. *Proceedings of the National Academy of  
731 Sciences of the United States of America* **110**: 17125-17130.  
732 <https://doi.org/10.1073/pnas.1307313110>

- 733  
734 **Channarayappa C, Shivashankar G, Muniyappa V, Frist RH. 1992.** Resistance of  
735 *Lycopersicon* species to *Bemisia tabaci*, a tomato leaf curl virus vector. *Canadian*  
736 *Journal of Botany* **70**: 2184-2192. <https://doi.org/10.1139/b92-270>  
737  
738 **Demissie ZA, Tarnowycz M, Adal AM, Sarker LS, Mahmoud SS. 2019.** A lavender  
739 ABC transporter confers resistance to monoterpene toxicity in yeast. *Planta* **249**: 139–  
740 144. <https://doi.org/10.1007/s00425-018-3064-x>  
741  
742 **Fan P, Miller AM, Schillmiller AL, Liu X, Ofner I, Jones AD, Zamir D, Last RL.**  
743 **2016.** *In vitro* reconstruction and analysis of evolutionary variation of the tomato  
744 acylsucrose metabolic network. *Proceedings of the National Academy of Sciences of*  
745 *the United States of America* **113**: E239-E248.  
746 <https://doi.org/10.1073/pnas.1517930113>  
747  
748 **Fan P, Leong BJ, Last R. 2019.** Tip of trichome: evolution of acylsugar metabolic  
749 diversity in Solanaceae. *Current Opinion in Plant Biology* **49**: 8-16.  
750 <https://doi.org/10.1016/j.pbi.2019.03.005>  
751  
752 **Firdaus S, van Heusden AW, Hidayati N, Supena EDJ, Visser RGF, Vosman B.**  
753 **2012.** Resistance to *Bemisia tabaci* in tomato wild relatives. *Euphytica* **187**:31–45.  
754 <https://doi.org/10.1007/s10681-012-0704-2>  
755  
756 **Firdaus S, van Heusden AW, Hidayati N, Supena EDJ, Mumm R, de Vos RCH,**  
757 **Visser RGF, Vosman B. 2013.** Identification and QTL mapping of whitefly resistance  
758 components in *Solanum galapagense*. *Theoretical and Applied Genetics* **126**: 1487-  
759 1501. <https://doi.org/10.1007/s00122-013-2067-z>  
760  
761 **Fobes JF, Mudd JB, Marsden MPF. 1985.** Epicuticular lipid accumulation on the  
762 leaves of *Lycopersicon pennellii* (Corr.) D'Arcy and *Lycopersicon esculentum* Mill.  
763 *Plant Physiology* **77**: 567-570. <https://doi.org/10.1104/pp.77.3.567>  
764  
765 **Frary A, Nesbitt TC, Grandillo S, Knaap E, Cong B, Liu J, Meller J, Elber R,**  
766 **Alpert KB, Tanksley SD. 2000.** *fw2.2*: a quantitative trait locus key to the evolution  
767 of tomato fruit size. *Science* **289**: 85–88. <https://doi.org/10.1126/science.289.5476.85>  
768  
769 **Fulton TM, Chunwongse J, Tanksley SD. 1995.** Microprep protocol for extraction of  
770 DNA from tomato and other herbaceous plants. *Plant Molecular Biology Reporter* **13**:  
771 207-209. <https://doi.org/10.1007/BF02670897>  
772  
773 **Garcia V, Bres C, Just D, Fernandez L, Tai FWJ, Mauxion J-P, Le Paslier M-C,**  
774 **Berard A, Brunel D, Aoki K et al. 2016.** Rapid identification of causal mutations in  
775 tomato EMS populations via mapping-by-sequencing. *Nature Protocols* **11**: 2401-  
776 2418. <https://doi.org/10.1038/nprot.2016.143>  
777  
778 **Ghosh B, Westbrook TC, Jones AD. 2014.** Comparative structural profiling of  
779 trichome specialized metabolites in tomato (*Solanum lycopersicum*) and *S.*  
780 *habrochaites*: acylsugar profiles revealed by UHPLC/MS and NMR. *Metabolomics* **10**:  
781 496-507. <https://doi.org/10.1007/s11306-013-0585-y>  
782

- 783 **Glas JJ, Schimmel BCJ, Alba JM, Escobar-Bravo R, Schuurink RC, Kant MR.**  
784 **2012.** Plant glandular trichomes as targets for breeding or engineering of resistance to  
785 herbivores. *International Journal of Molecular Sciences* **13**: 17077-17103.  
786 <https://doi.org/10.3390/ijms131217077>  
787
- 788 **Goffreda JC, Mutschler MA, Avé DA, Tingey WM, Steffens JC. 1989.** Aphid  
789 deterrence by glucose esters in glandular trichome exudate of the wild tomato,  
790 *Lycopersicon pennellii*. *Journal of Chemical Ecology* **15**: 2135-2147.  
791 <https://doi.org/10.1007/BF01207444>  
792
- 793 **Goffreda JC, Steffens JC, Mutschler MA. 1990.** Association of epicuticular sugars  
794 with aphid resistance in hybrids with wild tomato. *Journal of the American Society for*  
795 *Horticultural Science* **115**: 161-165. <https://doi.org/10.21273/JASHS.115.1.161>  
796
- 797 **Hawthorne DJ, Shapiro JA, Tingey WM, Mutschler MA. 1992.** Trichome-borne  
798 and artificially applied acylsugars of wild tomato deter feeding and oviposition of the  
799 leafminer *Liriomyza trifolii*. *Entomologia Experimentalis et Applicata* **65**: 65-73.  
800 <https://doi.org/10.1111/j.1570-7458.1992.tb01628.x>  
801
- 802 **Hopfgartner G, Tonoli D, Varesio E. 2012.** High-resolution mass spectrometry for  
803 integrated qualitative and quantitative analysis of pharmaceuticals in biological  
804 matrices. *Analytical and Bioanalytical Chemistry* **402**: 2587-2596.  
805 <https://doi.org/10.1007/s00216-011-5641-8>  
806
- 807 **Kandra L, Wagner GJ. 1988.** Studies of the site and mode of biosynthesis of tobacco  
808 trichome exudate components. *Archives of Biochemistry and Biophysics* **265**: 425-432.  
809 [https://doi.org/10.1016/0003-9861\(88\)90145-2](https://doi.org/10.1016/0003-9861(88)90145-2)  
810
- 811 **Kang JH, Liu G, Shi F, Jones AD, Beaudry RM, Howe GA. 2010.** The tomato  
812 *odorless-2* mutant is defective in trichome-based production of diverse specialized  
813 metabolites and broad-spectrum resistance to insect herbivores. *Plant Physiology* **154**:  
814 262–272. <https://doi.org/10.1104/pp.110.160192>  
815
- 816 **Kim J, Kang K, Gonzales-Vigil E, Shi F, Jones AD, Barry C, Last RL. 2012**  
817 Striking natural diversity in glandular trichome acylsugar composition is shaped by  
818 variation at the *Acyltransferase 2* locus in the wild tomato *Solanum habrochaites*. *Plant*  
819 *Physiology* **160**: 1854-1870. <https://doi.org/10.1104/pp.112.204735>  
820
- 821 **Kimura S, Koenig D, Kang J, Yoong FY, Sinha N. 2008.** Natural variation in leaf  
822 morphology results from mutation of a novel KNOX gene. *Current Biology* **18**: 672-  
823 677. <https://doi.org/10.1016/j.cub.2008.04.008>  
824
- 825 **Leckie BM, De Jong DM, Mutschler MA. 2012.** Quantitative trait loci increasing  
826 acylsugars in tomato breeding lines and their impacts on silverleaf whiteflies.  
827 *Molecular Breeding* **30**: 1621-1634. <https://doi.org/10.1007/s11032-012-9746-3>  
828
- 829 **Leckie BM, De Jong DM, Mutschler MA. 2013.** Quantitative trait loci regulating  
830 sugar moiety of acylsugars in tomato. *Molecular Breeding* **31**: 957-970.  
831 <https://doi.org/10.1007/s11032-013-9849-5>  
832

- 833 **Li H, Durbin R. 2009.** Fast and accurate short read alignment with Burrows-Wheeler  
834 transform. *Bioinformatics* **25**: 1754-1760.  
835 <https://doi.org/10.1093/bioinformatics/btp324>  
836
- 837 **Li H, Handsaker B, Wysoker A, Fennell T, Ruan J, Homer N, Marth G, Abecasis**  
838 **G, Durbin R, and 1000 Genome Project Data Processing Subgroup. 2009.** The  
839 Sequence Alignment/Map format and SAMtools. *Bioinformatics* **25**: 2078-2079.  
840 <https://doi.org/10.1093/bioinformatics/btp352>  
841
- 842 **Liedl BE, Lawson DM, White KK, Shapiro JA, Cohen DE, Carson WG, Trumble**  
843 **JT, Mutschler MA. 1995.** Acylsugars of wild tomato *Lycopersicon pennellii* alters  
844 settling and reduces oviposition of *Bemisia argentifolii* (Homoptera: Aleyrodidae).  
845 *Journal of Economic Entomology* **88**: 742-748. <https://doi.org/10.1093/jee/88.3.742>  
846
- 847 **Livak KJ, Schmittgen TD. 2001.** Analysis of relative gene expression data using real-  
848 time quantitative PCR and the 2(-Delta Delta C(T)) Method. *Methods* **25**: 402-408.  
849 <https://doi.org/10.1006/meth.2001.1262>  
850
- 851 **Lombardi-Crestana S, Azevedo MS, Ferreira e Silva GF, Pino LE, Appezzato-da-**  
852 **Glória B, Figueira A, Nogueira FTS, Peres LEP. 2012.** The tomato (*Solanum*  
853 *lycopersicum* cv. Micro-Tom) natural genetic variation *Rgl* and the DELLA mutant  
854 *procera* control the competence necessary to form adventitious roots and shoots.  
855 *Journal of Experimental Botany* **63**: 5689-5703. <https://doi.org/10.1093/jxb/ers221>  
856
- 857 **Luckwill LC. 1943.** *The genus Lycopersicon: an historical, biological, and taxonomic*  
858 *survey of the wild and cultivated tomatoes*. Aberdeen, UK: The University Press.  
859
- 860 **Luu VT, Weinhold A, Ullah C, Dressel S, Schoettner M, Gase K, Gaquerel E, Xu**  
861 **S, Baldwin IT. 2017.** O-acyl sugars protect a wild tobacco from both native fungal  
862 pathogens and a specialist herbivore. *Plant Physiology* **174**: 370-386.  
863 <https://doi.org/10.1104/pp.16.01904>  
864
- 865 **Maes L, van Nieuwerburgh FCW, Zhang Y, Reed DW, Pollier J, Vande Castele**  
866 **SRF, Inzé D, Covello PS, Deforce DLD, Goossens A. 2011.** Dissection of the  
867 phytohormonal regulation of trichome formation and biosynthesis of the antimalarial  
868 compound artemisinin in *Artemisia annua* plants. *New Phytologist* **189**: 176-189.  
869 <https://doi.org/10.1111/j.1469-8137.2010.03466.x>  
870
- 871 **Maluf WR, Maciel GM, Gomes LAA, Cardoso MG, Goncalves LD, da Silva EC,**  
872 **Knapp M. 2010.** Broad-spectrum arthropod resistance in hybrids between high- and  
873 low-acylsugar tomato lines. *Crop Science* **50**: 439-450.  
874 <https://doi.org/10.2135/cropsci2009.01.0045>  
875
- 876 **Mandal S, Wangming J, McKnight TD. 2019.** Candidate gene networks for acylsugar  
877 metabolism and plant defense in wild tomato *Solanum pennellii*. *Plant Cell* **32**: 81-99.  
878 <https://doi.org/10.1105/tpc.19.00552>  
879
- 880 **Mascher M, Jost M, Kuon J-E, Himmelbach A, Assfalg A, Beier S, Scholz U,**  
881 **Graner A, Stein N. 2014.** Mapping-by-sequencing accelerates forward genetics in  
882 barley. *Genome Biology* **15**: R78. <https://doi.org/10.1186/gb-2014-15-6-r78>



883

884 **McDowell ET, Kapteyn J, Schmidt A, Li C, Kang JH, Descour A, Shi F, Larson**  
885 **M, Schillmiller A, An L et al. 2011.** Comparative functional genomic analysis of  
886 *Solanum* glandular trichome types. *Plant Physiology* **155**: 524-539.  
887 <https://doi.org/10.1104/pp.110.167114>

888

889 **Mirnezhad M, Romero-González RR, Leiss KA, Choi YH, Verpoorte R,**  
890 **Klinkhamer PG. 2010.** Metabolomic analysis of host plant resistance to thrips in wild  
891 and cultivated tomatoes. *Phytochemical Analysis* **21**: 110-117.  
892 <https://doi.org/10.1002/pca.1182>

893

894 **Momotaz A, Scott JW, Schuster DJ. 2010.** Identification of quantitative trait loci  
895 conferring resistance to *Bemisia tabaci* in an F<sub>2</sub> population of *Solanum lycopersicum* x  
896 *Solanum habrochaites* accession LA1777. *Journal of the American Society for*  
897 *Horticultural Science* **135**: 134-142. <https://doi.org/10.21273/JASHS.135.2.134>

898

899 **Morris SE, Turnbull CGN, Murfet IC, Beveridge CA. 2001.** Mutational analysis of  
900 branching in pea. Evidence that *Rms1* and *Rms5* regulate the same novel signal. *Plant*  
901 *Physiology* **126**: 1205-1213. <https://doi.org/10.1104/pp.126.3.1205>

902

903 **Mutschler MA, Doerge RW, Liu SC, Kuai JP, Liedl BE, Shapiro JA. 1996.** QTL  
904 analysis of pest resistance in the wild tomato *Lycopersicon pennellii*: QTLs controlling  
905 acylsugar level and composition. *Theoretical and Applied Genetics* **92**: 709-718.  
906 <https://doi.org/10.1007/BF00226093>

907

908 **Nadakuduti SS, Uebler JB, Liu X, Jones AD, Barry CS. 2017.** Characterization of  
909 trichome-expressed BAHD acyltransferases in *Petunia axillaris* reveals distinct  
910 acylsugar assembly mechanisms within the *Solanaceae*. *Plant Physiology* **175**: 36-  
911 50. <https://doi.org/10.1104/pp.17.00538>

912

913 **Ning J, Moghe GD, Leong B, Kim J, Ofner I, Wang Z, Adams C, Jones AD,**  
914 **Zamir D, Last RL. 2015.** A feedback-insensitive isopropylmalate synthase affects  
915 acylsugar composition in cultivated and wild tomato. *Plant Physiology* **169**: 1821-  
916 1835. <https://doi.org/10.1104/pp.15.00474>

917

918 **Pesch M, Hülskamp M. 2011.** Role of *TRIPTYCHON* in trichome patterning in  
919 *Arabidopsis*. *BMC Plant Biology* **11**: 130. <https://doi.org/10.1186/1471-2229-11-130>

920

921 **Pino LE, Lombardi-Crestana S, Azevedo MS, Scotton DC, Borgo L, Quecini V,**  
922 **Figueira A, Peres LEP. 2010.** The *Rgl* allele as a valuable tool for genetic  
923 transformation of the tomato 'Micro-Tom' model system. *Plant Methods* **6**: 1-11.  
924 <https://doi.org/10.1186/1746-4811-6-23>

925

926 **Pnueli L, Carmel-Goren L, Hareven D, Gutfinger T, Alvarez J, Ganai M, Zamir**  
927 **D, Lifschitz E. 1998.** The *SELF-PRUNING* gene of tomato regulates vegetative to  
928 reproductive switching of sympodial meristems and is the ortholog of *CEN* and *TFL1*.  
929 *Development* **125**: 1979-1989. <https://doi.org/10.1242/dev.125.11.1979>

930

931 **Rodriguez-Lopez MJ, Garzo E, Bonani JP, Fereres A, Fernandez-Munoz R,**  
932 **Moriones E. 2011.** Whitefly resistance traits derived from the wild tomato *Solanum*

- 933 *pimpinellifolium* affect the preference and feeding behavior of *Bemisia tabaci* and  
934 reduce the spread of tomato yellow leaf curl virus. *Phytopathology* **101**: 1191-1201.  
935 <https://doi.org/10.1094/PHYTO-01-11-0028>  
936
- 937 **Ronen G, Carmel-Goren L, Zamir D, Hirschberg J. 2000.** An alternative pathway  
938 to beta-carotene formation in plant chromoplasts discovered by map-based cloning of  
939 *Beta* and *old-gold* color mutations in tomato. *Proceedings of the National Academy of*  
940 *Sciences of the United States of America* **97**: 11102-11107.  
941 <https://doi.org/10.1073/pnas.190177497>  
942
- 943 **Schilmiller AL, Last RL, Pichersky E. 2008.** Harnessing plant trichome biochemistry  
944 for the production of useful compounds. *Plant Journal* **54**: 702-711.  
945 <https://doi.org/10.1111/j.1365-313X.2008.03432.x>  
946
- 947 **Schilmiller AL, Shi F, Kim J, Charbonneau AL, Holmes D, Jones AD, Last RL.**  
948 **2010.** Mass spectrometry screening reveals widespread diversity in trichome  
949 specialized metabolites of tomato chromosomal substitution lines. *Plant Journal* **62**:  
950 391-403. <https://doi.org/10.1111/j.1365-313X.2010.04154.x>  
951
- 952 **Schilmiller AL, Charbonneau AL, Last RL. 2012.** Identification of a BAHD  
953 acetyltransferase that produces protective acyl sugars in tomato trichomes. *Proceedings*  
954 *of the National Academy of Sciences of the United States of America* **109**: 16377-16382.  
955 <https://doi.org/10.1073/pnas.1207906109>  
956
- 957 **Schilmiller AL, Moghe GD, Fan P, Ghosh B, Ning J, Jones AD, Last RL. 2015.**  
958 Functionally divergent alleles and duplicated loci encoding an acyltransferase  
959 contribute to acylsugar metabolite diversity in *Solanum* trichomes. *Plant Cell* **27**: 1002-  
960 1017. <https://doi.org/10.1105/tpc.15.00087>  
961
- 962 **Schilmiller AL, Gilgallon K, Ghosh B, Jones DA, Last RL. 2016.** Acylsugar  
963 acylhydrolases: carboxylesterase-catalyzed hydrolysis of acylsugars in tomato  
964 trichomes. *Plant Physiology* **170**: 1331-1344. <https://doi.org/10.1104/pp.15.01348>  
965
- 966 **Schurrink R, Tissier A. 2019.** Glandular trichomes: micro-organs with model status?  
967 *New Phytologist* **225**: 2251-2266. <https://doi.org/10.1111/nph.16283>  
968
- 969 **Simmons AT, Gurr GM. 2005.** Trichomes of *Lycopersicon* species and their hybrids:  
970 effects on pests and natural enemies. *Agricultural and Forest Entomology* **7**: 265-276.  
971 <https://doi.org/10.1111/j.1461-9555.2005.00271.x>  
972
- 973 **Smeda JR, Schilmiller AL, Anderson T, Ben-Mahmoud S, Ullman DE, Chappell**  
974 **TM, Kessler A, Mutschler MA. 2018.** Combination of acylglucose QTL reveals  
975 additive and epistatic genetic interactions and impacts insect oviposition and virus  
976 infection. *Molecular Breeding* **38**: 3. <https://doi.org/10.1007/s11032-017-0756-z>  
977
- 978 **Soyk S, Lemmon ZH, Oved M, Fisher J, Liberatore KL, Park SJ, Goren A, Jiang**  
979 **K, Ramos A, van der Knaap E et al. 2017a.** Bypassing negative epistasis on yield in  
980 tomato imposed by a domestication gene. *Cell* **169**: 1142-1155  
981 <https://doi.org/10.1016/j.cell.2017.04.032>  
982

983 **Soyk S, Muller NA, Park SJ, Schmalenbach I, Jiang K, Hayama R, Zhang L, Van**  
984 **Eck J, Jimenez-Gomez JM, Lippman ZB. 2017b.** Variation in the flowering gene  
985 *SELF PRUNING 5G* promotes day-neutrality and early yield in tomato. *Nature*  
986 *Genetics* **49**: 162-168. <https://doi.org/10.1038/ng.3733>

987  
988 **Tissier A. 2012.** Glandular trichomes: what comes after expressed sequence tags? *Plant*  
989 *Journal* **70**: 51–68. <https://doi.org/10.1111/j.1365-313X.2012.04913.x>

990  
991 **Vendemiatti E, Zsögön A, Ferreira e Silva GF, de Jesus FA, Cutri L, Figueiredo**  
992 **CR, Tanaka FAO, Nogueira FTS, Peres LEP. 2017.** Loss of type-IV glandular  
993 trichomes is a heterochronic trait in tomato and can be reverted by promoting juvenility.  
994 *Plant Science* **259**: 35-47. <https://doi.org/10.1016/j.plantsci.2017.03.006>

995  
996 **Vosman B, Kashaninia A, van't Westende W, Meijer-Dekens F, van Eekelen H,**  
997 **Visser RGF, de Vos RCH, Voorrips RE. 2019.** QTL mapping of insect resistance  
998 components of *Solanum galapagense*. *Theoretical and Applied Genetics* **132**: 531-541.  
999 <https://doi.org/10.1007/s00122-018-3239-7>

1000  
1001 **Weinhold A, Baldwin IT. 2011.** Trichome-derived *O*-acyl sugars are a first meal for  
1002 caterpillars that tags them for predation. *Proceedings of the National Academy of*  
1003 *Sciences of the United States of America* **108**: 7855-7859.  
1004 <https://doi.org/10.1073/pnas.1101306108>

1005  
1006 **Xia J, Guo Z, Yang Z, Han H, Wang S, Xu H, Yang X, Yang F, Wu Q, Xie W et**  
1007 **al. 2021.** Whitefly hijacks a plant detoxification gene that neutralizes plant toxins. *Cell*  
1008 **184**: 1693-1705.e17. <https://doi.org/10.1016/j.cell.2021.02.014>

## 1009 1010 **FIGURE LEGENDS**

1011  
1012 **Figure 1** Introgression of *Solanum galapagense* (LA1401) type-IV trichome into the  
1013 Micro-Tom (MT) model system. Representative light microscopy showing type-IV  
1014 glandular trichomes on the adaxial (a) and abaxial (b) sides of the leaf. Scale bar=250  
1015  $\mu\text{m}$ . (c) Introgression scheme used to create the Micro-Tom (MT) line bearing type-IV  
1016 trichomes on adult leaves. The line was designated “*Galapagos enhanced trichomes*”  
1017 (*Get*). X inside a circumference = self-pollination, BC= backcross. (d, e) Density ( $\text{mm}^{-2}$ )  
1018 of type-IV trichomes on both leaf surfaces of the wild species (n=35) (d) and  $F_1$  plants  
1019 (MT x *S. galapagense* LA1401) (n=30) (e). Data are mean  $\pm$  SEM.

1020  
1021  
1022 **Figure 2** Scanning electron micrographs of abaxial surfaces of the 5<sup>th</sup> leaf of  
1023 representative 25-day-old plants of the tomato wild relative *Solanum galapagense*  
1024 LA1401 (a), Micro-Tom (b), and the “*Galapagos enhanced trichomes*” line (MT-*Get*)

1025 (c). Scale bar=200  $\mu\text{m}$ . The arrowheads represent the different trichomes: type IV  
1026 (pink), type V (green), and type VI (yellow). (d) Type-IV trichome stalk height and  
1027 gland size comparisons between *S. galapagense* and MT-*Get*. Data are mean ( $n=30$ )  $\pm$   
1028 SEM. The data are not statistically different according to Student's *t*-test ( $P < 0.05$ ).

1029

1030 **Figure 3** p*SLAT2::GFP* expression (green fluorescence) at the tip cells of MT and MT-  
1031 *Get* type-IV trichomes on: the cotyledons (a juvenile organ) from MT (a, b) and MT-  
1032 *Get* (c, d); and on the 5<sup>th</sup> leaf (an adult organ) from MT (e, f) and MT-*Get* (g, h). Scale  
1033 bar= 100 $\mu\text{m}$ .

1034

1035 **Figure 4** Density ( $\text{mm}^{-2}$ ) of types-IV and -V trichomes on the adaxial (a) and abaxial  
1036 (b) surface of mature 5<sup>th</sup> leaves of 45-day-old plants of Micro-Tom (MT) and MT-*Get*.  
1037 (c, d) Representative micrographs of both surfaces of 5<sup>th</sup> leave of 45-day-old MT plants.  
1038 (e, f) Representative micrographs of both surfaces of 5<sup>th</sup> leave of 45-day-old MT-*Get*  
1039 (f) plants. Data are mean ( $n=40$ )  $\pm$  SEM. Asterisks indicate a significant difference  
1040 when compared with the reference sample according to the Student's *t*-test at  $P < 0.001$   
1041 (\*\*\*). Scale bars= 250  $\mu\text{m}$ .

1042

1043 **Figure 5** (a) Allelic frequency indicating the chromosomal positions where MT-*Get*  
1044 has introgressions from *S. galapagense* LA1401. (b) Representation of the  
1045 corresponding positions of the chromosomal fragments from *S. galapagense* (pink bars)  
1046 introgressed into MT-*Get*. The positions were based on the *Solanum lycopersicum* cv.  
1047 Heinz reference genome sequence. Relevant genes (as discussed in the text) and their  
1048 SGN (Solyc) ID numbers are represented. Note that the MT-*Get* genome bears the MT-  
1049 mutated alleles for *DWARF* (Bishop *et al.*, 1996) and *SP* (Pnueli *et al.*, 1998), which  
1050 are determinant of the MT reduced plant size and determinate habit growth,  
1051 respectively (Carvalho *et al.*, 2011). The presence of the MT allele at the *SP5G* locus  
1052 also contributes to the reduced plant size of MT-*Get*, since the *S. galapagense* allele  
1053 promotes additional vegetative growth due to a lack of flower induction under long  
1054 days (Soyk *et al.*, 2017b). MT-*Get* also lacks *S. galapagense* alleles for genes  
1055 conferring additional phenotypes distinct to this wild species, such as highly dissected  
1056 leaves (*Pts*) (Kimura *et al.*, 2008) and  $\beta$ -carotene accumulating fruits (*B*) (Ronen *et al.*,

1057 2000). The impact of the wild species alleles *EJ-2* and *FW3.2* on the MT-*Get* phenotype  
1058 is shown in Figure S6 and discussed in the text.

1059

1060 **Figure 6** Acylsugar (AS) content in *Solanum galapagense* LA1401, Micro-Tom (MT),  
1061 and MT-*Get*. (a) Representative LC-MS chromatogram. Peak area quantifications are  
1062 shown in Table 1. (b) Signal intensity for each one of the AS analyzed in the three  
1063 genotypes.

1064

1065 **Figure 7** Relative transcript accumulation of acylsugar acyltransferase (*ASAT*) genes  
1066 in leaf tissues of MT-*Get* and *S. galapagense*. qRT-PCR values are means  $\pm$  SE.  
1067 Asterisks indicate statistically significant differences when compared with the  
1068 reference sample according to the Student's *t*-test at  $P < 0.05$  (\*);  $P < 0.01$  (\*\*);  $P < 0.001$   
1069 (\*\*\*).

1070

1071 **Figure 8** (a) Schematic representation of trichome type distribution in each genotype  
1072 used in this work. (b) Logarithmic scale representation of the results of total trichomes  
1073 related to the total acylsugar content (types I and IV). (c) Sequential steps to obtain  
1074 broad and durable insect-resistant tomatoes through the high production of acylsugars  
1075 on tomato leaves.

1076

## 1077 SUPPORTING INFORMATION LEGENDS

1078

1079 **Figure S1** Mapping-by-sequencing bioinformatics analysis pipeline.

1080

1081 **Figure S2** Absence of green fluorescence in the tip cells of non-transgenic MT-*Get*  
1082 type-IV trichomes as seen in light (a) and fluorescent (b) microscopy. (c) Fluorescence  
1083 of type-IV trichomes showing chloroplast (red color) in *S. galapagense*. Scale bar=20  
1084  $\mu\text{m}$ .

1085

1086 **Figure S3** Quantification of type-IV and -V trichomes in the adaxial (a-b) and abaxial  
1087 (c-d) surfaces of cotyledons (Cot), first (L1), second (L2), third (L3), fourth (L4), fifth  
1088 (L5) and sixth (L6) leaves of Micro-Tom (black bars) and MT-*Get* (white bars). Data  
1089 are mean ( $n = 30$ )  $\pm$  SEM. Asterisks indicate mean significantly different from the  
1090 control MT, according to Student *t*-test  $P < 0.001$  (\*\*\*).

1091

1092 **Figure S4** (a) Density ( $\text{mm}^{-2}$ ) of types-I and -IV trichomes in both surfaces of leaves  
1093 from *S. galapagense*. (b, c) Density ( $\text{mm}^{-2}$ ) of others trichomes types in adaxial (b) and  
1094 abaxial surfaces (c) of MT and MT-*Get*. Data are mean ( $n = 35$ )  $\pm$  SEM. Asterisks  
1095 indicate significant differences when compared with reference sample according to  
1096 Student's *t*-test  $P < 0.001$  (\*\*\*).

1097

1098 **Figure S5** Density ( $\text{mm}^{-2}$ ) of types-IV and -V trichomes in abaxial surfaces of 5<sup>th</sup>  
1099 leaves from MT-*Get* (a, b) and their derived sublines MT-*Get*01 (c, d), MT-*Get*02 (e,  
1100 f) and MT-*Get*03 (g, h). MT-*Get*01, 02 and 03 are BC<sub>7</sub>F<sub>n</sub> lines harbouring *S.*  
1101 *galapagense*'s chromosome 1, 2 and 3 segments. Data are mean ( $n=30$ )  $\pm$  SEM.

1102

1103 **Figure S6** (a) Phenotype of representative 35-day-old Micro-Tom (MT) and the MT-  
1104 *Get* plants. Scale bar=5 cm. (b) Branching Index values ( $n = 15$ ). (c) Main stem height  
1105 ( $n = 15$ ). (d) Average fruit weight of MT-*Get* ( $n = 15$ ). Fruits and sepals from MT (e),  
1106 MT-*Get* (f), and *S. galapagense* (g). Note the small calyx and the slightly smaller fruit  
1107 of the MT-*Get*, which are, respectively, the expected effects of the *EJ-2* and *FW3.2*  
1108 alleles from *S. galapagense*. Note that MT-*Get* has the same red fruit that is  
1109 characteristic of MT due to an absence of the *S. galapagense B* allele (see Fig. 5). The  
1110 presence of the B allele in *S. galapagense* produces an orange fruit (g) (Ronen *et al.*,  
1111 2000). Scale bar =5 mm. (h) PCR-based markers showing the presence of the *S.*  
1112 *galapagense* alleles *EJ-2* and *FW3.2* (see Fig. 5). The asterisks indicate significant  
1113 statistical differences according to the Student's *t*-test at  $P < 0.05$  (\*) or  $P < 0.001$  (\*\*\*).

1114

1115 **Figure S7** Representative photographs of whitefly (*Bemisia tabaci*) nymph infestation  
1116 on Micro-Tom (a) and MT-*Get* (b) leaves. Scale bar=250  $\mu\text{m}$ . (c) Quantification of  
1117 *Bemisia tabaci* nymphs in MT-*Get* compared to the control MT ( $n=30$ ). The data are  
1118 not statistically different according to the Student's *t*-test ( $P < 0.05$ ). (d, e)  
1119 Representative micrographs of *Solanum galapagense* droplets on type-IV trichomes (d)  
1120 and their absence in MT-*Get* (e). In the inserts, trichomes were dyed with Rhodamine-  
1121 B, revealing AS exudation in *S. galapagense* type-IV trichomes.

1122

1123 **Figure S8** (a) GC-MS comparison between *Solanum galapagense* LA1401, Micro-  
1124 Tom and MT-*Get* regarding acyl groups content. The scale at the y-axis is in arbitrary

1125 units. (b) Full scan mass spectrum showing relative abundance of ions for acyl groups  
1126 peaks found on extracts analysed by GC-MS.

1127

1128 **Figure S9** Relative transcript accumulation of the (a-c) *ASHs* enzymes and (d) ABC  
1129 transporter in leaves of MT-*Get* and *S. galapagense*. qRT-PCR values are means  $\pm$  SE  
1130 of three biological samples. Asterisks indicate a significant difference when compared  
1131 with reference sample according to Student's *t*-test  $P < 0.05$  (\*);  $P < 0.01$  (\*\*);  $P <$   
1132 0.001 (\*\*\*)).

1133

1134 **Table S1** Oligonucleotide sequences used in this work.

1135

1136 **Table S2** Genomic coordinates of the genetic variation from *S. galapagense* present at  
1137 high frequencies ( $\geq 0.8$ ) in the *Get*-like phenotypical group of the MT-*Get* segregating  
1138 population.

1139

1140 **Table S3** GC-MS content of acyl groups in *S. galapagense*, Micro-Tom (MT) and MT-  
1141 *Get* leaves.

1142

1143

**Table 1.** Peak areas from ion chromatograms (LC-MS) of acyl sugars from *S. galapagense*, MT-*Get* and MT.

| AS               | <i>m/z</i> | Peak area             |                     |                   | <i>S.galap./</i><br>MT- <i>Get</i> |
|------------------|------------|-----------------------|---------------------|-------------------|------------------------------------|
|                  |            | <i>S. galapagense</i> | MT- <i>Get</i>      | MT                |                                    |
| S3:20 (5,5,10)   | 709.368    | 675.914 <b>a</b>      | 72.873 <b>b</b>     | 7.192 <b>c</b>    | 9.28                               |
| S3:22 (5,5,12)   | 737.403    | 9,877.349 <b>a</b>    | 1,767.007 <b>b</b>  | 145.07 <b>c</b>   | 5.59                               |
| S4:16 (2,4,5,5)  | 667.279    | 18,907.925 <b>a</b>   | 3,835.183 <b>b</b>  | 514.101 <b>c</b>  | 4.93                               |
| S4:17 (2,5,5,5)  | 681.297    | 61,140.597 <b>a</b>   | 22,592.369 <b>b</b> | 2,509.92 <b>c</b> | 2.71                               |
| S4:22 (2,5,5,10) | 751.375    | 5,363.138 <b>a</b>    | 125.538 <b>b</b>    | 26.872 <b>c</b>   | 42.72                              |
| S4:23 (2,4,5,12) | 765.396    | 5,864.023 <b>a</b>    | 48.632 <b>b</b>     | 26.809 <b>c</b>   | 120.58                             |
| S4:24 (2,5,5,12) | 779.413    | 26,335.227 <b>a</b>   | 1,446.972 <b>b</b>  | 301.079 <b>c</b>  | 18.20                              |

Acyl sugars were identified according to their *m/z* and retention time (n=4). For the sake of simplicity values were divided by 1000. Values followed by different letters in each row are statistically different according to Student's *t*-test ( $P < 0.05$ ).



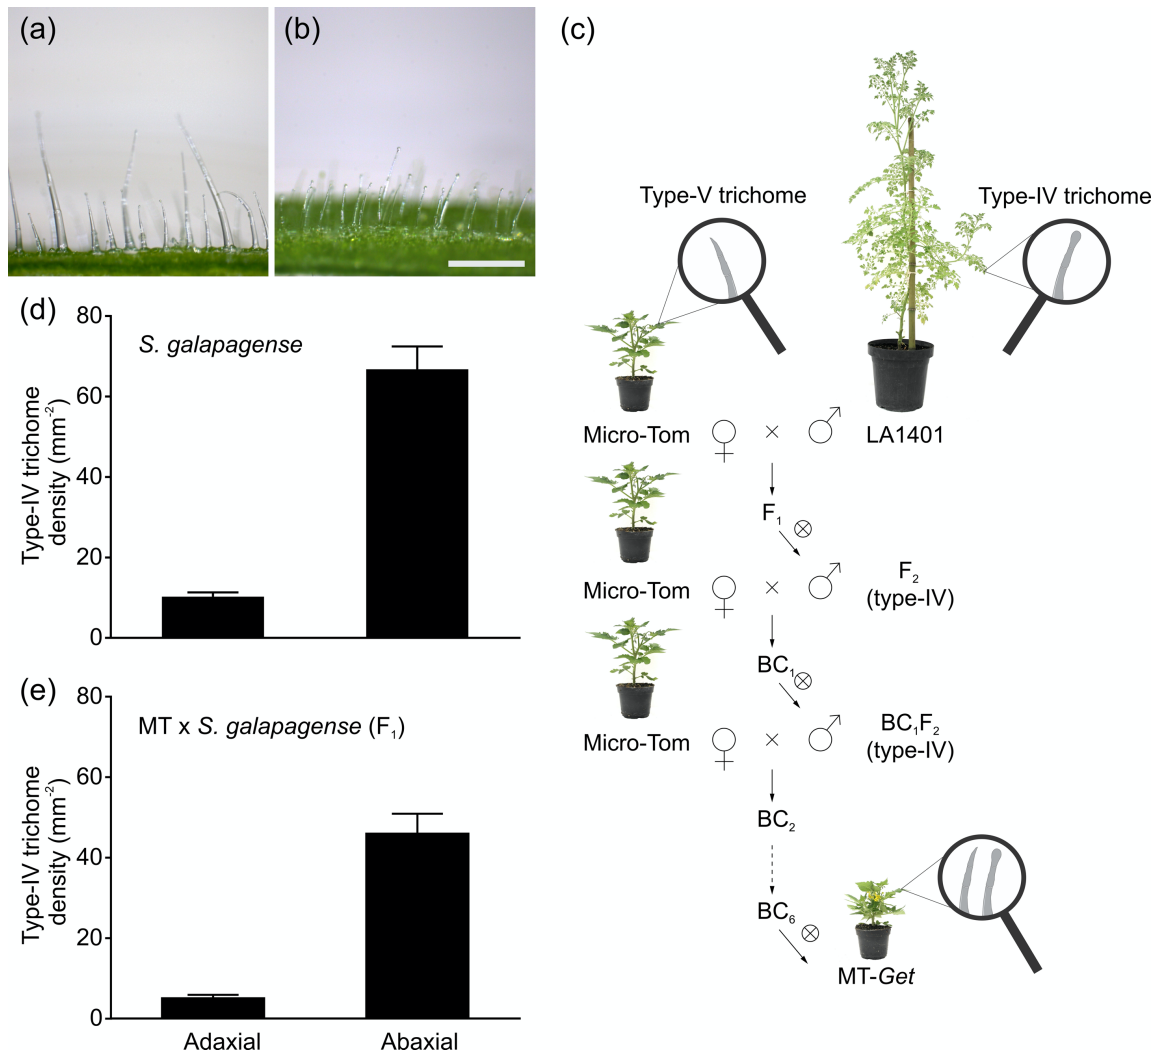

**Figure 1** Introgression of *Solanum galapagense* (LA1401) type-IV trichome into the Micro-Tom (MT) model system. Representative light microscopy showing type-IV glandular trichomes on the adaxial (a) and abaxial (b) sides of the leaf. Scale bar=250  $\mu\text{m}$ . (c) Introgression scheme used to create the Micro-Tom (MT) line bearing type-IV trichomes on adult leaves. The line was designated “*Galapagos enhanced trichomes*” (*Get*). X inside a circumference = self-pollination, BC= backcross. (d, e) Density ( $\text{mm}^{-2}$ ) of type-IV trichomes on both leaf surfaces of the wild species ( $n=35$ ) (d) and F<sub>1</sub> plants (MT x *S. galapagense* LA1401) ( $n=30$ ) (e). Data are mean  $\pm$  SEM.

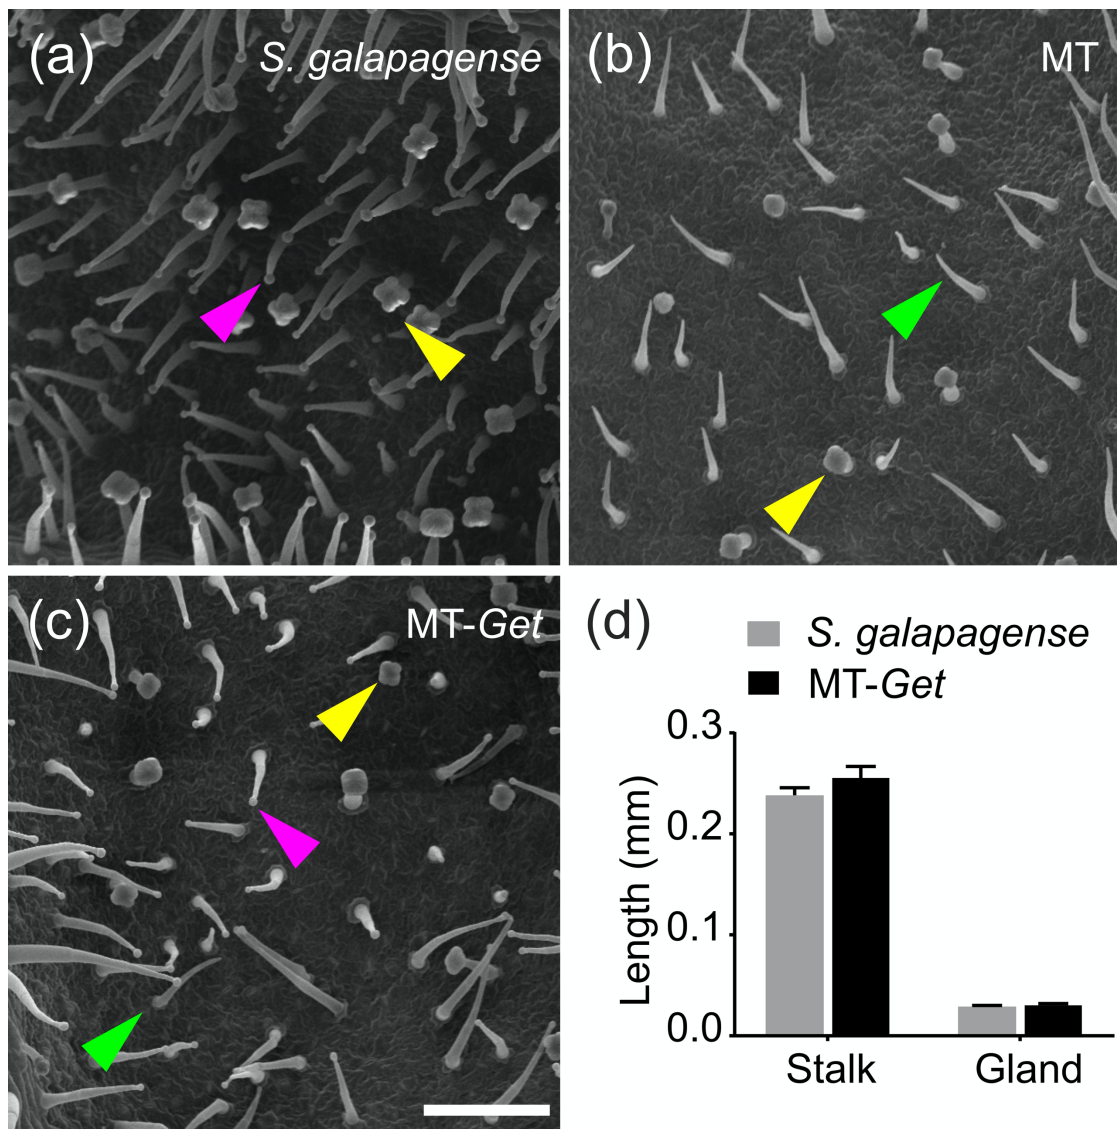

**Figure 2** Scanning electron micrographs of abaxial surfaces of the 5<sup>th</sup> leaf of representative 25-day-old plants of the tomato wild relative *Solanum galapagense* LA1401 (a), Micro-Tom (b), and the "Galapagos enhanced trichomes" line (MT-Get) (c). Scale bar=200  $\mu$ m. The arrowheads represent the different trichomes: type IV (pink), type V (green), and type VI (yellow). (d) Type-IV trichome stalk height and gland size comparisons between *S. galapagense* and MT-Get. Data are mean (n=30)  $\pm$  SEM. The data are not statistically different according to Student's *t*-test ( $P < 0.05$ ).

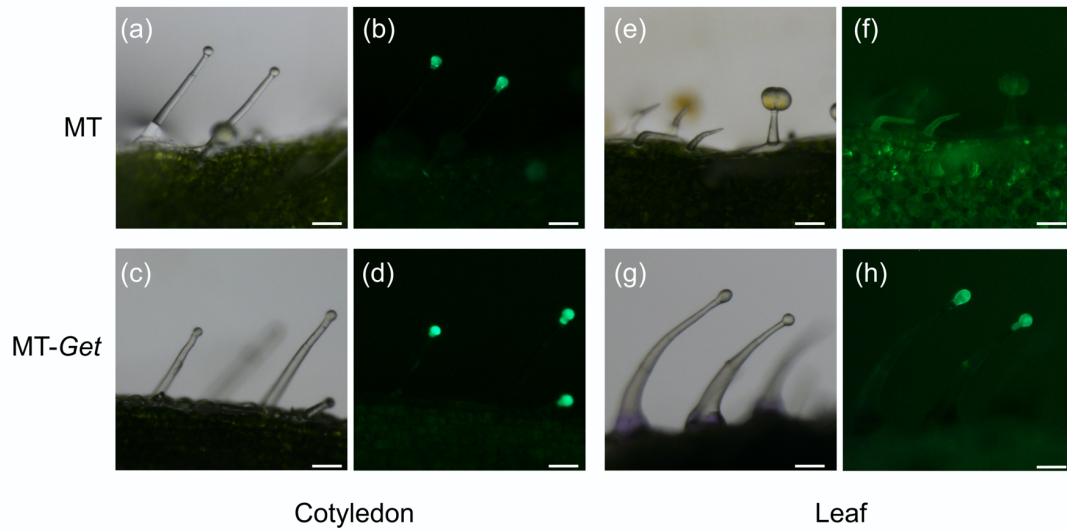

**Figure 3** *pSLAT2::GFP* expression (green fluorescence) at the tip cells of MT and MT-*Get* type-IV trichomes on: the cotyledons (a juvenile organ) from MT (a, b) and MT-*Get* (c, d); and on the 5<sup>th</sup> leaf (an adult organ) from MT (e, f) and MT-*Get* (g, h). Scale bar= 100 $\mu$ m.

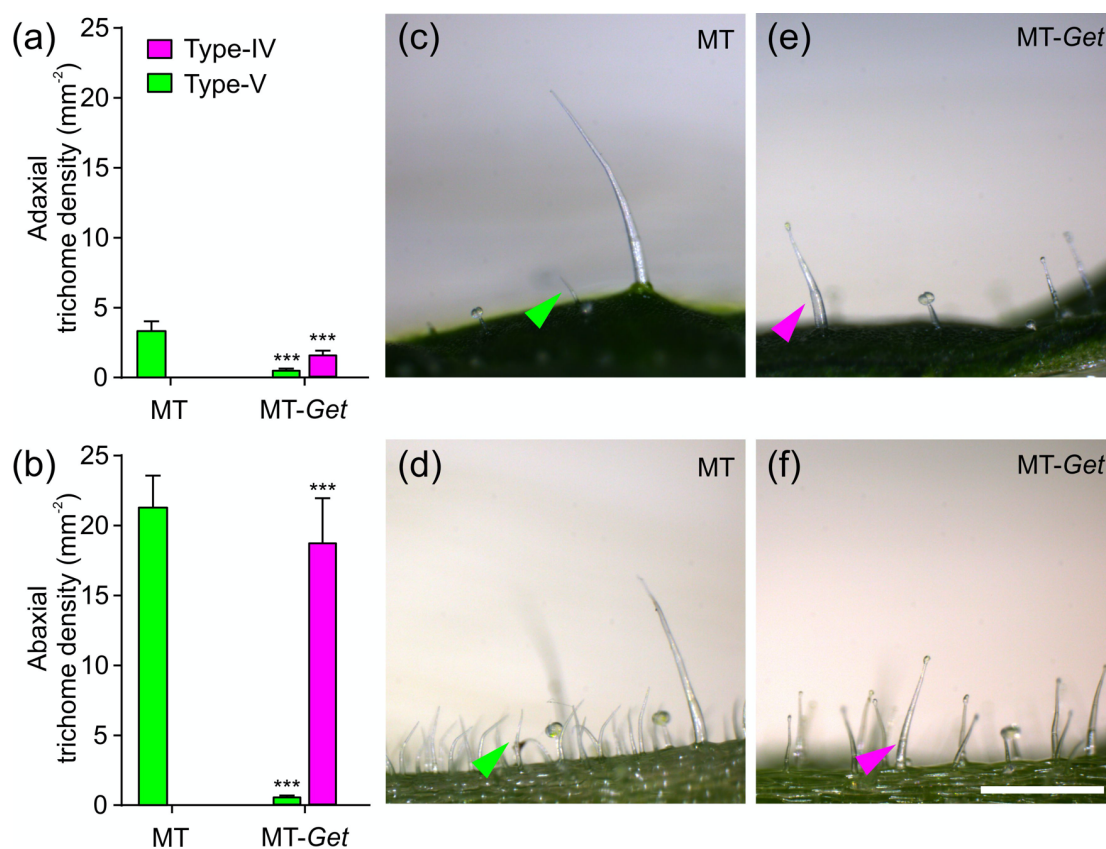

**Figure 4** Density ( $\text{mm}^{-2}$ ) of types-IV and -V trichomes on the adaxial (a) and abaxial (b) surface of mature 5<sup>th</sup> leaves of 45-day-old plants of Micro-Tom (MT) and MT-Get. (c, d) Representative micrographs of both surfaces of 5<sup>th</sup> leaf of 45-day-old MT plants. (e, f) Representative micrographs of both surfaces of 5<sup>th</sup> leaf of 45-day-old MT-Get (f) plants. Data are mean ( $n=40$ )  $\pm$  SEM. Asterisks indicate a significant difference when compared with the reference sample according to the Student's  $t$ -test at  $P < 0.001$  (\*\*\*)). Scale bars= 250  $\mu\text{m}$ .

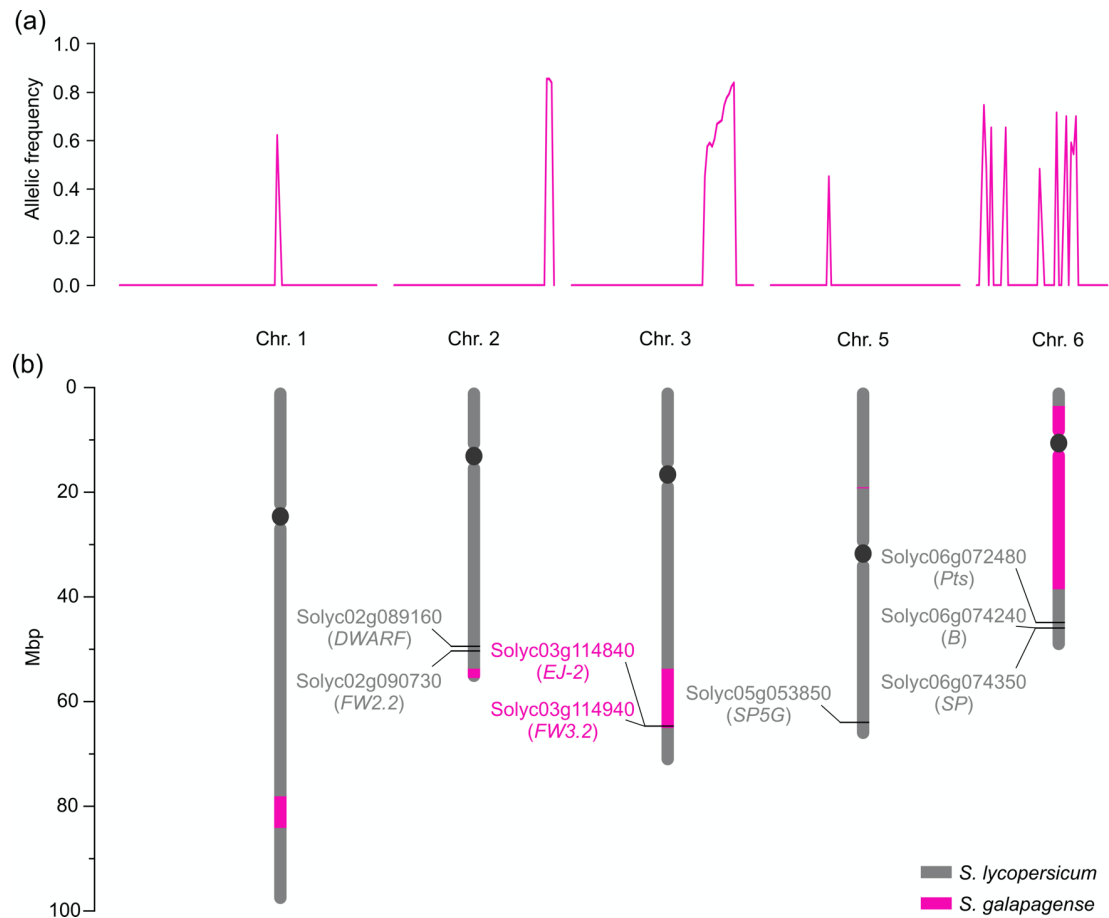

**Figure 5** (a) Allelic frequency indicating the chromosomal positions where *MT-Get* has introgressions from *S. galapagense* LA1401. (b) Representation of the corresponding positions of the chromosomal fragments from *S. galapagense* (pink bars) introgressed into *MT-Get*. The positions were based on the *Solanum lycopersicum* cv. Heinz reference genome sequence. Relevant genes (as discussed in the text) and their SGN (Solyc) ID numbers are represented. Note that the *MT-Get* genome bears the *MT*-mutated alleles for *DWARF* (Bishop *et al.*, 1996) and *SP* (Pnueli *et al.*, 1998), which are determinant of the *MT* reduced plant size and determinate habit growth, respectively (Carvalho *et al.*, 2011). The presence of the *MT* allele at the *SP5G* locus also contributes to the reduced plant size of *MT-Get*, since the *S. galapagense* allele promotes additional vegetative growth due to a lack of flower induction under long days (Soyk *et al.*, 2017b). *MT-Get* also lacks *S. galapagense* alleles for genes conferring additional phenotypes distinct to this wild species, such as highly dissected leaves (*Pts*) (Kimura *et al.*, 2008) and  $\beta$ -carotene accumulating fruits (*B*) (Ronen *et al.*, 2000). The impact of the wild species alleles *EJ-2* and *FW3.2* on the *MT-Get* phenotype is shown in Figure S6 and discussed in the text.

1144

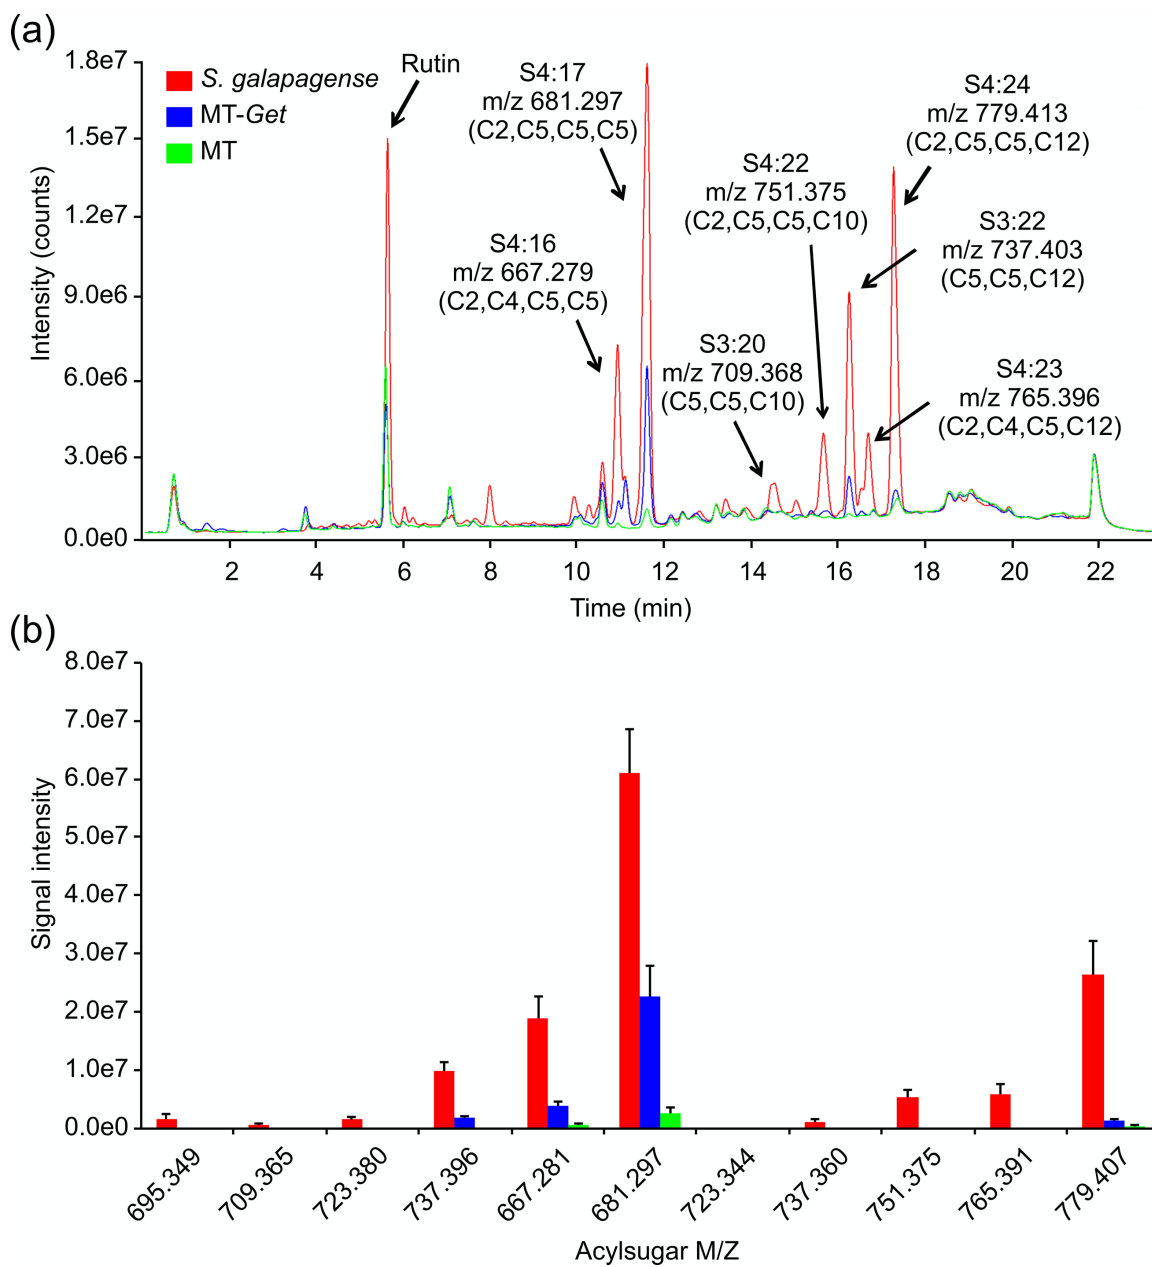

**Figure 6** Acylsugar (AS) content in *Solanum galapagense* LA1401, Micro-Tom (MT), and MT-Get. (a) Representative LC-MS chromatogram. Peak area quantifications are shown in Table 1. (b) Signal intensity for each one of the AS analyzed in the three genotypes.

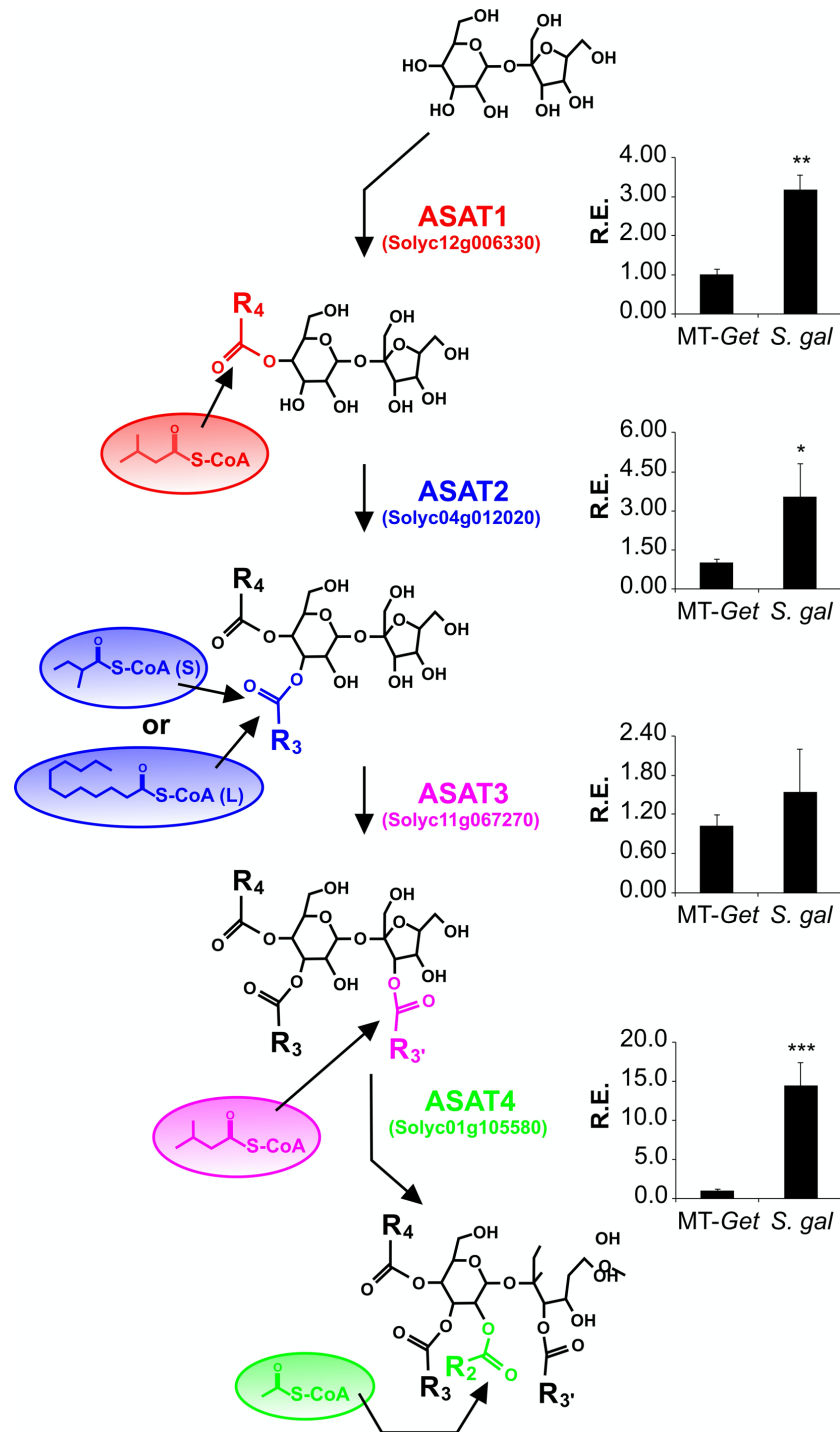

**Figure 7** Relative transcript accumulation of acylsugar acyltransferase (*ASAT*) genes in leaf tissues of MT-Get and *S. galapagense*. qRT-PCR values are means  $\pm$  SE. Asterisks indicate statistically significant differences when compared with the reference sample according to the Student's *t*-test at  $P < 0.05$  (\*);  $P < 0.01$  (\*\*);  $P < 0.001$  (\*\*\*)).

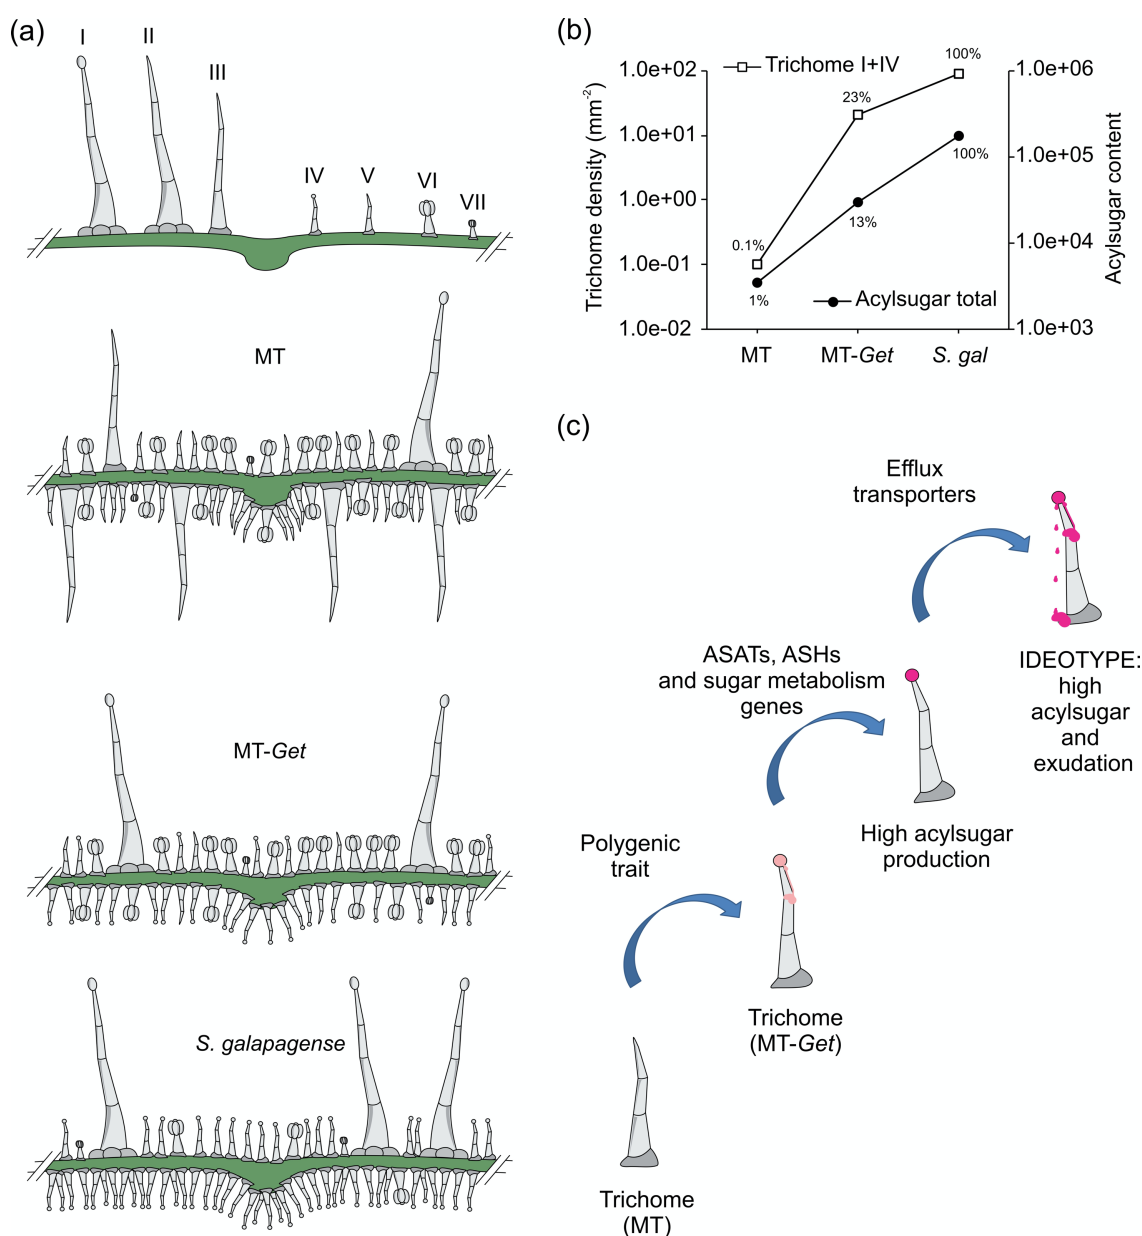

**Figure 8** (a) Schematic representation of trichome type distribution in each genotype used in this work. (b) Logarithmic scale representation of the results of total trichomes related to the total acylsugar content (types I and IV). (c) Sequential steps to obtain broad and durable insect-resistant tomatoes through the high production of acylsugars on tomato leaves.
